# Supplementary material for: Novel Immune Infiltrating Cell Signature Based on Cell Pair Algorithm Is a Prognostic Marker in Cancer
Source: Front Immunol. 2021 Sep 14;12:694490. doi: 10.3389/fimmu.2021.694490 (PMC8476752; doi:10.3389/fimmu.2021.694490)
Supplement: Supplementary file 5 [file DataSheet_5.xlsx]

## Sheet: Sheet 1
Table S5. ICP score constructed in six independent cancer types in TCGA
Univariate Cox analysis about immune cells in TCGA BRCA							ICP score of each sample						Univariate Cox analysis about immune cells in TCGA HNSC							ICP score of each sample						Univariate Cox analysis about immune cells in TCGA LIHC							ICP score of each sample						Univariate Cox analysis about immune cells in TCGA LUAD							ICP score of each sample
gene	HR	z	pvalue	lower	upper		sample	status	time	score	group		gene	HR	z	pvalue	lower	upper		sample	status	time	score	group		gene	HR	z	pvalue	lower	upper		sample	status	time	score	group		gene	HR	z	pvalue	lower	upper		sample	status	time	score
B.Cells	0.583681	-1.80762	0.0706652	0.32557	1.04642		TCGA-5L-AAT0-01	0	49.2333	0	low		B.Cells	0.502654	-2.82683	0.00470115	0.311994	0.809827		TCGA-BB-4223-01	0	107.367	0	low		B.Cells	0.693299	-1.10019	0.271247	0.361016	1.33142		TCGA-2Y-A9GT-01	1	54.1333	0	low		B.Cells	0.556006	-2.16148	0.0306579	0.326532	0.946745		TCGA-38-7271-01	1	26.6667	0
CD8.T.cell	0.649643	-1.27662	0.201735	0.335027	1.25971		TCGA-A2-A04P-01	1	18.2667	0	low		CD8.T.cell	0.464935	-2.74781	0.0059994	0.269246	0.802851		TCGA-BB-4225-01	0	4.86667	0	low		CD8.T.cell	0.522678	-1.71404	0.0865206	0.24891	1.09755		TCGA-BD-A3EP-01	0	13.6333	0	low		CD8.T.cell	0.58704	-1.56073	0.118587	0.300719	1.14597		TCGA-38-A44F-01	0	4.43333	0
cytotoxic.T.cells	0.71687	-2.55874	0.0105052	0.555532	0.925063		TCGA-A2-A04Q-01	0	79.5	0	low		cytotoxic.T.cells	0.656989	-3.61717	0.000297847	0.52324	0.824925		TCGA-CN-4733-01	0	52.8667	0	low		cytotoxic.T.cells	0.617647	-3.1672	0.00153915	0.458399	0.832217		TCGA-DD-A1ED-01	0	76.7	0	low		cytotoxic.T.cells	0.734316	-2.40222	0.0162958	0.570765	0.944732		TCGA-44-2656-01	0	47.6333	0
GRANS	1.34511	0.69867	0.484758	0.585537	3.09004		TCGA-A2-A04Y-01	0	36.6333	0	low		GRANS	1.66887	1.5811	0.113855	0.88451	3.14879		TCGA-CN-4735-01	0	57.9	0	low		GRANS	1.64649	1.0379	0.299317	0.642109	4.22194		TCGA-DD-A4NI-01	0	27.2	0	low		GRANS	1.46621	1.19668	0.231431	0.78342	2.74408		TCGA-44-2657-01	0	45.0333	0
LYMPHS	0.658159	-1.69564	0.0899547	0.405827	1.06738		TCGA-A2-A0CL-01	0	100.5	0	low		LYMPHS	1.64858	2.66355	0.00773219	1.14117	2.38162		TCGA-CN-4738-01	1	14.5333	0	low		LYMPHS	1.6735	2.18041	0.0292268	1.05344	2.65853		TCGA-DD-A4NS-01	1	81.8667	0	low		LYMPHS	1.08021	0.367801	0.713022	0.716068	1.62952		TCGA-44-3918-01	0	34.5333	0
CD4..Tcm	1.24371	0.551457	0.581321	0.572895	2.69998		TCGA-A2-A0CO-01	1	116.4	0	low		CD4..Tcm	0.416522	-2.56493	0.0103196	0.213298	0.813368		TCGA-CN-4739-01	1	46.4667	0	low		CD4..Tcm	1.93014	1.66451	0.0960111	0.88983	4.18667		TCGA-DD-A4NV-01	0	79.9333	0	low		CD4..Tcm	0.670078	-1.21652	0.223787	0.351553	1.2772		TCGA-44-5645-01	0	28.4	0
CD4..Tem	1.28576	0.55688	0.57761	0.530843	3.11425		TCGA-A2-A0CR-01	0	109.433	0	low		CD4..Tem	0.688127	-1.02002	0.307719	0.335544	1.4112		TCGA-CN-5358-01	1	8.7	0	low		CD4..Tem	2.91171	2.55558	0.0106011	1.28285	6.60876		TCGA-DD-A73C-01	0	23.3667	0	low		CD4..Tem	1.24357	0.575478	0.564968	0.591888	2.61278		TCGA-44-6148-01	0	23.4667	0
DC	0.882624	-0.464548	0.642255	0.521195	1.49469		TCGA-A2-A0EN-01	0	136.267	0	low		DC	0.737252	-1.34907	0.177314	0.473463	1.14801		TCGA-CN-5360-01	0	72.3	0	low		DC	0.761543	-0.874007	0.382114	0.413422	1.4028		TCGA-DD-AACT-01	0	52.0667	0	low		DC	0.658416	-1.77478	0.0759345	0.415013	1.04457		TCGA-44-6778-01	0	62.1333	0
Macrophages	1.20145	0.827065	0.4082	0.777713	1.85607		TCGA-A2-A0EQ-01	0	80.8667	0	low		Macrophages	1.29115	1.41751	0.156334	0.90684	1.83834		TCGA-CN-5369-01	1	12.6667	0	low		Macrophages	1.09201	0.324413	0.745625	0.641634	1.8585		TCGA-DD-AADA-01	0	41.1	0	low		Macrophages	0.907928	-0.518465	0.604134	0.630192	1.30807		TCGA-44-A47G-01	0	11.7	0
Neutrophils	1.13619	0.341573	0.732672	0.546096	2.36392		TCGA-A2-A0ST-01	0	100.567	0	low		Neutrophils	0.907162	-0.340234	0.73368	0.517515	1.59018		TCGA-CN-5374-01	1	57.7333	0	low		Neutrophils	0.778433	-0.626962	0.530684	0.355766	1.70325		TCGA-DD-AAE2-01	0	21.2667	0	low		Neutrophils	0.922973	-0.253288	0.800046	0.496383	1.71617		TCGA-49-AARR-01	0	166.4	0
Tgd.cells	1.10002	0.321336	0.747956	0.615007	1.96753		TCGA-A2-A0SX-01	0	51.1333	0	low		Tgd.cells	0.812084	-0.803574	0.421643	0.488778	1.34924		TCGA-CN-6012-01	0	48.6667	0	low		Tgd.cells	1.8707	1.77963	0.075136	0.938508	3.72881		TCGA-DD-AAE7-01	0	21.4667	0	low		Tgd.cells	1.6484	1.89513	0.0580753	0.983046	2.76408		TCGA-50-5049-01	0	103.133	0
Th1.cells	0.780303	-0.771246	0.440561	0.415406	1.46573		TCGA-A2-A0SY-01	0	44.9	0	low		Th1.cells	0.865968	-0.50502	0.613545	0.495392	1.51375		TCGA-CN-A6V1-01	0	20.1	0	low		Th1.cells	0.729683	-0.846679	0.397174	0.351807	1.51343		TCGA-DD-AAEH-01	0	26.1333	0	low		Th1.cells	1.11944	0.360495	0.718477	0.606153	2.06739		TCGA-55-6971-01	0	46.6667	0
Th2.cells	0.732618	-0.827789	0.40779	0.350708	1.53041		TCGA-A2-A0T6-01	0	19.1667	0	low		Th2.cells	0.964213	-0.114954	0.908482	0.517992	1.79483		TCGA-CN-A6V6-01	0	21.1667	0	low		Th2.cells	1.25487	0.559239	0.575999	0.566287	2.78075		TCGA-G3-A3CH-01	0	26	0	low		Th2.cells	1.81864	1.64989	0.0989648	0.893685	3.70093		TCGA-55-6987-01	0	71.2333	0
Tregs	0.927256	-0.333199	0.738984	0.594646	1.44591		TCGA-A2-A0YI-01	0	50.1667	0	low		Tregs	0.654898	-2.26322	0.0236219	0.45392	0.944862		TCGA-CR-5243-01	0	85.4	0	low		Tregs	0.854705	-0.590161	0.555083	0.507427	1.43966		TCGA-G3-A3CI-01	0	6	0	low		Tregs	0.605404	-2.39044	0.0168284	0.401181	0.913588		TCGA-55-7728-01	0	23.4667	0
aDC	1.18959	0.611226	0.54105	0.681749	2.07574		TCGA-A2-A0YK-01	0	19.6	0	low		aDC	0.949348	-0.220126	0.825773	0.597623	1.50808		TCGA-CR-5248-01	0	55.4333	0	low		aDC	1.21224	0.581857	0.560663	0.633899	2.31825		TCGA-G3-AAUZ-01	0	16	0	low		aDC	1.10324	0.395853	0.692213	0.678265	1.79449		TCGA-55-8513-01	0	26.3667	0
iDC	0.784731	-0.763853	0.444955	0.421294	1.46169		TCGA-A2-A1G0-01	0	20.5333	0	low		iDC	1.1209	0.448003	0.654151	0.680317	1.84682		TCGA-CR-5249-01	0	38.4	0	low		iDC	1.02326	0.0699437	0.944239	0.537183	1.94918		TCGA-LG-A9QD-01	0	12.2	0	low		iDC	0.647904	-1.74709	0.0806214	0.398158	1.0543		TCGA-55-8619-01	0	13.8667	0
pDC	0.601726	-1.27097	0.203741	0.274921	1.31701		TCGA-A2-A259-01	0	53.2	0	low		pDC	0.670752	-1.33714	0.181178	0.37354	1.20444		TCGA-CR-5250-01	0	26.6333	0	low		pDC	0.625716	-1.04469	0.296166	0.259631	1.50799		TCGA-MR-A520-01	0	7.63333	0	low		pDC	0.598471	-1.59756	0.110142	0.318792	1.12351		TCGA-55-8621-01	0	17.1667	0
CD4..T.cells	0.813001	-0.804279	0.421236	0.490896	1.34646		TCGA-A2-A3XZ-01	0	51.0667	0	low		CD4..T.cells	0.495419	-3.21332	0.0013121	0.322791	0.760368		TCGA-CR-6467-01	0	59.2333	0	low		CD4..T.cells	0.913152	-0.303171	0.761759	0.507527	1.64296		TCGA-UB-AA0V-01	0	10.4667	0	low		CD4..T.cells	0.631253	-1.74004	0.0818514	0.375972	1.05987		TCGA-55-A4DG-01	0	20.2667	0
CD8..Tcm	0.838195	-0.642116	0.520798	0.489066	1.43656		TCGA-A2-A4RY-01	0	21.6	0	low		CD8..Tcm	0.686053	-1.5846	0.113056	0.430479	1.09336		TCGA-CR-6470-01	0	50.7	0	low		CD8..Tcm	0.789307	-0.753079	0.451403	0.426401	1.46108		TCGA-2Y-A9GV-01	1	84.4	1	low		CD8..Tcm	0.789895	-0.917837	0.358704	0.477351	1.30708		TCGA-62-8397-01	0	42.9667	0
CD8..Tem	0.726586	-1.68581	0.0918328	0.501206	1.05332		TCGA-A7-A0CG-01	0	34.7667	0	low		CD8..Tem	0.701311	-1.99183	0.0463899	0.494637	0.99434		TCGA-CR-6471-01	1	40.0667	0	low		CD8..Tem	0.552711	-2.61561	0.00890688	0.35444	0.861892		TCGA-5R-AA1D-01	0	14.9667	1	low		CD8..Tem	0.72197	-1.80315	0.0713644	0.506681	1.02874		TCGA-67-4679-01	0	14.9333	0
Eosinophils	0.47227	-1.72863	0.0838747	0.201735	1.10561		TCGA-A7-A13E-01	1	20.4667	0	low		Eosinophils	0.548688	-1.78303	0.0745811	0.283651	1.06137		TCGA-CR-6482-01	0	11.5	0	low		Eosinophils	0.117232	-4.18047	2.90906e-05	0.0429121	0.320268		TCGA-BC-A10X-01	1	25.6667	1	low		Eosinophils	0.37191	-2.90436	0.00368004	0.19079	0.724973		TCGA-69-8453-01	0	27.1	0
Macrophages.M2	0.956085	-0.246719	0.805126	0.669207	1.36595		TCGA-A7-A13G-01	0	23.9333	0	low		Macrophages.M2	1.05015	0.317227	0.751071	0.776143	1.4209		TCGA-CR-6487-01	0	7.8	0	low		Macrophages.M2	0.970576	-0.143053	0.886248	0.644651	1.46128		TCGA-BC-A110-01	1	70.5333	1	low		Macrophages.M2	0.879492	-0.810353	0.417738	0.644686	1.19982		TCGA-75-7025-01	0	110.167	0
Mast.cells	0.981816	-0.0495299	0.960497	0.474951	2.02961		TCGA-A7-A26E-01	0	31.8	0	low		Mast.cells	0.563817	-1.97902	0.0478141	0.319649	0.994498		TCGA-CR-7367-01	0	48	0	low		Mast.cells	0.9712	-0.0701101	0.944106	0.429059	2.19837		TCGA-BC-A69I-01	0	12.9	1	low		Mast.cells	0.557635	-1.9164	0.0553148	0.306855	1.01337		TCGA-86-8671-01	0	27.9667	0
Memory.B.cells	0.312831	-2.79321	0.00521876	0.138413	0.707042		TCGA-A7-A26F-01	0	24.6	0	low		Memory.B.cells	0.358257	-3.01494	0.00257032	0.183816	0.698241		TCGA-CR-7388-01	1	27.4333	0	low		Memory.B.cells	0.134107	-4.21509	2.49679e-05	0.05269	0.341331		TCGA-DD-A3A2-01	1	71.0333	1	low		Memory.B.cells	0.357457	-3.06048	0.00220982	0.184971	0.690787		TCGA-86-A4P8-01	0	26.8333	0
Monocytes	1.1345	0.409646	0.682066	0.620291	2.07497		TCGA-A7-A26J-01	0	20.9	0	low		Monocytes	0.866301	-0.609871	0.541947	0.546203	1.37399		TCGA-CR-7391-01	0	30.4333	0	low		Monocytes	1.33775	0.886522	0.375336	0.703041	2.54546		TCGA-DD-A3A6-01	1	108.6	1	low		Monocytes	0.87305	-0.54647	0.584743	0.5365	1.42072		TCGA-91-8497-01	1	14.4667	0
NK.cells	0.699968	-0.953073	0.340553	0.336114	1.45771		TCGA-A7-A3J1-01	0	11.4333	0	low		NK.cells	0.763947	-0.939718	0.347362	0.435682	1.33954		TCGA-CR-7392-01	0	47.5	0	low		NK.cells	0.693402	-0.901059	0.367557	0.31268	1.5377		TCGA-DD-A4NB-01	0	32.9667	1	low		NK.cells	0.839054	-0.537674	0.590802	0.442571	1.59073		TCGA-93-A4JO-01	1	1.1	0
NKT	0.689569	-1.27366	0.202785	0.389201	1.22175		TCGA-A7-A4SA-01	0	15.1333	0	low		NKT	0.860678	-0.570946	0.568036	0.514233	1.44053		TCGA-CR-7393-01	0	33.1	0	low		NKT	0.949705	-0.149058	0.881508	0.481842	1.87186		TCGA-DD-A4NK-01	1	40.3333	1	low		NKT	0.792535	-0.869481	0.384584	0.469233	1.33859		TCGA-97-7552-01	0	64.4	0
Endothelial.cells	1.87645	1.99835	0.0456785	1.01216	3.47876		TCGA-A8-A08X-01	0	43.6	0	low		Endothelial.cells	1.49367	1.53218	0.125477	0.894023	2.49551		TCGA-CR-7394-01	0	44.8667	0	low		Endothelial.cells	0.995607	-0.0134948	0.989233	0.525276	1.88707		TCGA-DD-A4NL-01	0	57.0333	1	low		Endothelial.cells	1.89672	2.29281	0.0218592	1.09738	3.27831		TCGA-97-7553-01	0	62.3333	0
Fibroblasts	1.32551	1.17013	0.241947	0.826786	2.12506		TCGA-A8-A09K-01	0	30.4	0	low		Fibroblasts	1.37994	1.62597	0.103957	0.935989	2.03447		TCGA-CR-7404-01	0	49.0667	0	low		Fibroblasts	1.08971	0.285951	0.774916	0.604763	1.96351		TCGA-DD-A4NP-01	0	110.267	1	low		Fibroblasts	1.47544	1.66494	0.0959254	0.933399	2.33225		TCGA-97-8172-01	0	18.1667	0
Adipocytes	0.763033	-1.23003	0.218688	0.495889	1.17409		TCGA-A8-A0A2-01	0	19.3	0	low		Adipocytes	1.16527	0.714778	0.474746	0.766093	1.77244		TCGA-CV-5431-01	1	17.4	0	low		Adipocytes	0.524563	-2.22478	0.026096	0.297131	0.926078		TCGA-DD-AAC9-01	0	11.5667	1	low		Adipocytes	1.06249	0.218549	0.827002	0.616922	1.82988		TCGA-97-A4M2-01	0	20.8	0
Astrocytes	1.07226	0.345138	0.729991	0.721485	1.59358		TCGA-A8-A0A6-01	0	21.3333	0	low		Astrocytes	1.12778	0.731936	0.464207	0.817295	1.55622		TCGA-CV-5443-01	0	92.8	0	low		Astrocytes	0.787286	-1.04406	0.296456	0.502514	1.23344		TCGA-DD-AACC-01	1	56.1667	1	low		Astrocytes	1.10024	0.520976	0.602383	0.768084	1.57603		TCGA-99-8028-01	0	37.2667	0
Basophils	0.310277	-1.98718	0.0469027	0.097827	0.984101		TCGA-AC-A2FB-01	0	41.1333	0	low		Basophils	0.913032	-0.200946	0.840741	0.375907	2.21764		TCGA-CV-6939-01	1	22.2	0	low		Basophils	0.060682	-4.64681	3.37108e-06	0.018611	0.197856		TCGA-DD-AADK-01	0	34.9667	1	low		Basophils	0.285163	-2.44488	0.0144902	0.104294	0.779694		TCGA-99-AA5R-01	0	21.9333	0
CD4..memory.T.cells	1.61268	1.44681	0.147951	0.844085	3.08112		TCGA-AC-A2FF-01	0	91.9667	0	low		CD4..memory.T.cells	1.74679	2.09636	0.0360502	1.03696	2.94251		TCGA-CV-6942-01	0	142.733	0	low		CD4..memory.T.cells	3.43109	3.52834	0.000418172	1.72983	6.8055		TCGA-DD-AAE4-01	0	20.2667	1	low		CD4..memory.T.cells	2.35381	3.17834	0.00148119	1.3884	3.99052		TCGA-J2-A4AE-01	0	35.9667	0
CD4..naive.T.cells	0.647069	-1.77311	0.0762097	0.399925	1.04694		TCGA-AC-A2FK-01	0	88.3333	0	low		CD4..naive.T.cells	0.448922	-4.03408	5.48162e-05	0.304213	0.662467		TCGA-CV-7238-01	0	90.9	0	low		CD4..naive.T.cells	0.781729	-0.909007	0.363346	0.459694	1.32936		TCGA-DD-AAVR-01	0	83.7667	1	low		CD4..naive.T.cells	0.53647	-2.62569	0.00864733	0.337026	0.853941		TCGA-L4-A4E6-01	0	14.5	0
CD8..naive.T.cells	0.670854	-0.75285	0.45154	0.237287	1.89663		TCGA-AC-A2FO-01	0	75.1667	0	low		CD8..naive.T.cells	0.922162	-0.20351	0.838736	0.422546	2.01252		TCGA-CV-7242-01	0	36.5	0	low		CD8..naive.T.cells	2.90735	2.00241	0.0452412	1.02288	8.2636		TCGA-ED-A4XI-01	0	27.3	1	low		CD8..naive.T.cells	1.48565	0.852751	0.393798	0.598114	3.69018		TCGA-L9-A743-01	0	22.1333	0
cDC	0.759899	-1.25141	0.210784	0.494306	1.1682		TCGA-AC-A2QH-01	0	33.5	0	low		cDC	0.851014	-0.816839	0.41402	0.577861	1.25329		TCGA-CV-7410-01	1	213.9	0	low		cDC	0.72057	-1.27832	0.201136	0.435975	1.19094		TCGA-ED-A627-01	0	14.1	1	low		cDC	0.63875	-2.30764	0.0210192	0.436507	0.934697		TCGA-MP-A4TH-01	0	24.7	0
Class.switched.memory.B.cells	0.965166	-0.130353	0.896287	0.566349	1.64483		TCGA-AC-A3OD-01	0	15.0333	0	low		Class.switched.memory.B.cells	0.542215	-2.5802	0.00987419	0.340599	0.863175		TCGA-CV-A45T-01	1	161.867	0	low		Class.switched.memory.B.cells	1.59537	1.51632	0.129437	0.872263	2.91795		TCGA-EP-A3JL-01	0	10.1	1	low		Class.switched.memory.B.cells	0.837918	-0.678829	0.497246	0.502878	1.39618		TCGA-05-5420-01	0	15.2333	1
CLP	1.53284	1.4645	0.143056	0.865455	2.71487		TCGA-AC-A3QQ-01	0	24.4667	0	low		CLP	2.8969	4.10598	4.02601e-05	1.74354	4.8132		TCGA-CV-A45W-01	1	46.6	0	low		CLP	3.70518	3.6899	0.000224339	1.84789	7.42922		TCGA-G3-A5SK-01	0	24.8	1	low		CLP	2.39407	3.41827	0.000630197	1.45127	3.94936		TCGA-44-2661-01	0	38.6333	1
CMP	0.181908	-2.49583	0.0125662	0.0477106	0.693564		TCGA-AC-A6IX-06	0	12.4333	0	low		CMP	0.231047	-2.99709	0.00272571	0.0886318	0.602299		TCGA-CV-A45Y-01	1	90.1	0	low		CMP	0.100088	-2.87606	0.00402676	0.0208531	0.480395		TCGA-G3-A7M5-01	0	14.9	1	low		CMP	0.220378	-2.64668	0.00812864	0.071905	0.675424		TCGA-44-2662-01	0	42.6667	1
Erythrocytes	1.4497	1.70014	0.0891051	0.944827	2.22435		TCGA-AC-A8OQ-01	0	1.13333	0	low		Erythrocytes	1.21378	0.982396	0.325905	0.824658	1.78651		TCGA-CV-A460-01	1	61.2667	0	low		Erythrocytes	2.31623	3.27813	0.00104497	1.40179	3.8272		TCGA-HP-A5N0-01	1	38.2333	1	low		Erythrocytes	2.02908	3.51136	0.000445818	1.36701	3.0118		TCGA-44-3917-01	0	39.4333	1
GMP	1.66039	1.44407	0.148718	0.834316	3.30438		TCGA-AN-A0FJ-01	0	8.06667	0	low		GMP	1.4002	1.13283	0.257287	0.782092	2.50683		TCGA-CV-A468-01	1	15.4667	0	low		GMP	4.28293	3.65204	0.000260162	1.96201	9.34936		TCGA-K7-A5RF-01	0	21.0333	1	low		GMP	2.44361	2.85273	0.0043345	1.32262	4.51468		TCGA-44-6147-01	0	28.1667	1
HSC	1.18051	0.575819	0.564738	0.671064	2.07669		TCGA-AO-A03R-01	0	69.7	0	low		HSC	0.854571	-0.610073	0.541813	0.515795	1.41586		TCGA-CV-A6K0-01	0	20.2	0	low		HSC	0.338116	-3.4442	0.000572762	0.182421	0.626696		TCGA-MI-A75E-01	0	16.9	1	low		HSC	0.464696	-2.96589	0.00301813	0.280042	0.771109		TCGA-50-5045-01	1	72.4667	1
ly.Endothelial.cells	1.12947	0.6247	0.532168	0.770877	1.65487		TCGA-AO-A03T-01	0	70.8	0	low		ly.Endothelial.cells	0.826293	-1.04777	0.294744	0.578263	1.18071		TCGA-CX-7085-01	0	10.7	0	low		ly.Endothelial.cells	0.692914	-1.62534	0.104089	0.445203	1.07845		TCGA-MR-A8JO-01	0	11	1	low		ly.Endothelial.cells	1.00828	0.0448518	0.964225	0.703184	1.44575		TCGA-50-5055-01	1	61	1
Macrophages.M1	1.79782	2.07973	0.0375503	1.03436	3.12481		TCGA-AO-A0JB-01	0	51.4	0	low		Macrophages.M1	1.34134	1.24049	0.214793	0.84339	2.1333		TCGA-DQ-7593-01	0	40.8	0	low		Macrophages.M1	2.17603	2.22622	0.0259993	1.09745	4.31464		TCGA-NI-A8LF-01	0	26.6333	1	low		Macrophages.M1	1.2109	0.822337	0.410885	0.767413	1.91067		TCGA-50-8457-01	0	37.5	1
Macrophages.M0	2.42614	2.66727	0.00764713	1.26494	4.65328		TCGA-AO-A0JC-01	0	51.5667	0	low		Macrophages.M0	3.0562	3.9455	7.96338e-05	1.75454	5.32353		TCGA-H7-A76A-01	0	21.2333	0	low		Macrophages.M0	3.36063	2.94503	0.00322927	1.49996	7.52943		TCGA-ZS-A9CG-01	0	11.3667	1	low		Macrophages.M0	1.88396	2.37123	0.017729	1.11611	3.18006		TCGA-53-7626-01	1	30.9667	1
Megakaryocytes	0.680457	-1.60907	0.107601	0.425735	1.08758		TCGA-AO-A0JJ-01	0	62.9	0	low		Megakaryocytes	0.706103	-1.72939	0.0837386	0.475978	1.04749		TCGA-HD-A6HZ-01	0	3.7	0	low		Megakaryocytes	0.25711	-4.98419	6.22233e-07	0.150715	0.438613		TCGA-2Y-A9GX-01	0	81.4	2	low		Megakaryocytes	0.559343	-2.7611	0.00576065	0.370312	0.844867		TCGA-55-6979-01	1	7.9	1
Melanocytes	0.614986	-1.45856	0.144687	0.32	1.1819		TCGA-AO-A12D-01	0	83.8333	0	low		Melanocytes	0.820211	-0.729684	0.465584	0.481643	1.39677		TCGA-MT-A67F-01	0	12.8	0	low		Melanocytes	0.446702	-1.96611	0.0492856	0.200046	0.997483		TCGA-2Y-A9H3-01	0	50.5333	2	low		Melanocytes	0.74308	-0.932661	0.350995	0.398125	1.38692		TCGA-55-8208-01	0	22.4667	1
MEP	1.84459	1.89014	0.0587395	0.977636	3.48034		TCGA-AO-A1KO-01	0	20.7333	0	low		MEP	1.71391	2.19659	0.0280498	1.05976	2.77184		TCGA-P3-A6SW-01	0	37.3333	0	low		MEP	3.51913	3.46347	0.000533257	1.72667	7.17235		TCGA-5R-AAAM-01	1	1.53333	2	low		MEP	2.25657	3.00513	0.00265465	1.32717	3.83681		TCGA-55-8301-01	0	17.8	1
MPP	0.608545	-1.46033	0.144198	0.312453	1.18523		TCGA-AO-A1KR-01	0	83.7667	0	low		MPP	0.674553	-1.49945	0.133758	0.403199	1.12853		TCGA-QK-A6IF-01	0	23.4667	0	low		MPP	0.732247	-0.841345	0.400155	0.354298	1.51337		TCGA-DD-A11C-01	0	22.0667	2	low		MPP	0.735015	-1.01447	0.310361	0.405488	1.33234		TCGA-55-8510-01	0	17.9667	1
MSC	1.80762	1.90257	0.0570967	0.982299	3.32636		TCGA-AQ-A04J-01	0	27.3	0	low		MSC	2.64663	3.64066	0.000271937	1.56724	4.46942		TCGA-QK-A6VC-01	0	20	0	low		MSC	3.62619	3.61185	0.000304022	1.80246	7.29518		TCGA-DD-A4ND-01	0	91.5333	2	low		MSC	2.81242	3.3279	0.000875021	1.52966	5.1709		TCGA-69-8254-01	0	13.6333	1
mv.Endothelial.cells	3.6788	2.9233	0.00346344	1.53611	8.8103		TCGA-AQ-A1H3-01	0	32.9667	0	low		mv.Endothelial.cells	1.96432	2.15081	0.0314911	1.06174	3.63418		TCGA-BA-5153-01	1	58.7333	1	low		mv.Endothelial.cells	3.73351	3.33031	0.000867504	1.71954	8.10628		TCGA-DD-A4NG-01	1	26.7333	2	low		mv.Endothelial.cells	3.11567	3.53764	0.000403713	1.66	5.84783		TCGA-86-6851-01	0	5.96667	1
naive.B.cells	0.476832	-2.00776	0.0446689	0.231412	0.982524		TCGA-AQ-A54O-01	0	33.3667	0	low		naive.B.cells	0.346565	-3.65782	0.000254371	0.196421	0.611479		TCGA-BA-5559-01	1	69.4333	1	low		naive.B.cells	0.524843	-1.46877	0.141895	0.22204	1.24059		TCGA-DD-A73F-01	0	36.1667	2	low		naive.B.cells	0.312781	-3.74656	0.000179275	0.170287	0.574512		TCGA-86-8076-01	0	33.1	1
Pericytes	1.58354	1.47581	0.139994	0.860025	2.91571		TCGA-AQ-A7U7-01	1	19.4667	0	low		Pericytes	1.28053	0.912491	0.361511	0.752877	2.17799		TCGA-BB-4217-01	0	6.23333	1	low		Pericytes	2.8675	2.91852	0.00351693	1.41339	5.81759		TCGA-DD-AACY-01	0	48.3333	2	low		Pericytes	1.71742	1.91881	0.0550085	0.988467	2.98395		TCGA-86-8280-01	0	23.3667	1
Plasma.cells	1.34711	0.592302	0.553648	0.502572	3.61085		TCGA-AR-A0TS-01	0	85.2667	0	low		Plasma.cells	1.80583	1.33303	0.182521	0.757326	4.30599		TCGA-BB-7861-01	0	22.7333	1	low		Plasma.cells	2.14312	1.42229	0.154943	0.749639	6.12688		TCGA-DD-AAD2-01	0	21.9333	2	low		Plasma.cells	0.837791	-0.409364	0.682273	0.359024	1.95501		TCGA-86-A4P7-01	0	13.8333	1
Platelets	2.08895	1.1629	0.244872	0.603554	7.23003		TCGA-AR-A1AM-01	0	99.7	0	low		Platelets	1.05609	0.130211	0.896399	0.464445	2.40143		TCGA-CN-4722-01	0	49.4333	1	low		Platelets	0.459898	-1.2655	0.205694	0.138103	1.53152		TCGA-DD-AADS-01	0	15.8	2	low		Platelets	0.820063	-0.398803	0.690038	0.309343	2.17398		TCGA-91-7771-01	0	16.4	1
Preadipocytes	2.25491	2.78126	0.0054148	1.27139	3.99928		TCGA-AR-A1AQ-01	0	100.7	0	low		Preadipocytes	2.22567	3.34191	0.000832046	1.39214	3.55827		TCGA-CN-5359-01	1	12.5667	1	low		Preadipocytes	3.14104	3.40149	0.000670204	1.62426	6.07422		TCGA-DD-AAE1-01	0	18.4	2	low		Preadipocytes	2.9244	4.17365	2.99758e-05	1.76679	4.8405		TCGA-93-7347-01	0	22.7667	1
pro.B.cells	0.312563	-2.16778	0.0301754	0.109218	0.894503		TCGA-AR-A1AW-01	0	87.7333	0	low		pro.B.cells	0.470936	-1.33273	0.18262	0.155599	1.42533		TCGA-CN-5373-01	0	52.8	1	low		pro.B.cells	0.232586	-1.96947	0.0488997	0.0544784	0.992988		TCGA-DD-AAVX-01	0	57.2667	2	low		pro.B.cells	0.977213	-0.0395104	0.968483	0.311446	3.06616		TCGA-97-8177-01	0	16.6333	1
Cytotoxic.cells	0.69005	-2.15345	0.031283	0.492309	0.967216		TCGA-AR-A1AX-01	0	87.6333	0	low		Cytotoxic.cells	0.657895	-2.78966	0.00527638	0.490226	0.88291		TCGA-CN-6010-01	0	50.7667	1	low		Cytotoxic.cells	0.49932	-3.67574	0.000237164	0.344786	0.723116		TCGA-ED-A7XO-01	0	14.2333	2	low		Cytotoxic.cells	0.715818	-1.94942	0.0512451	0.51147	1.00181		TCGA-97-8552-01	0	20.8667	1
NK.CD56dim.cells	0.69776	-1.2673	0.205046	0.399933	1.21737		TCGA-AR-A252-01	0	94.6	0	low		NK.CD56dim.cells	0.540428	-2.27693	0.0227905	0.318186	0.9179		TCGA-CN-6017-01	1	28.4333	1	low		NK.CD56dim.cells	0.612479	-1.59562	0.110574	0.335403	1.11845		TCGA-FV-A3R3-01	1	12.2	2	low		NK.CD56dim.cells	0.897714	-0.401323	0.688183	0.529998	1.52055		TCGA-97-A4LX-01	0	20.4667	1
NK.CD57dim.cells	0.87119	-0.627346	0.530433	0.566256	1.34033		TCGA-AR-A2LE-01	0	168.733	0	low		NK.CD57dim.cells	0.928613	-0.373485	0.708787	0.629564	1.36971		TCGA-CQ-5323-01	0	48.8667	1	low		NK.CD57dim.cells	0.540695	-2.38248	0.0171963	0.326035	0.896687		TCGA-G3-AAV0-01	0	15.8667	2	low		NK.CD57dim.cells	0.995006	-0.0268257	0.978599	0.690184	1.43445		TCGA-97-A4M7-01	0	20.9667	1
T.helper.cells	1.05791	0.212079	0.832045	0.628783	1.7799		TCGA-AR-A2LN-01	0	38.7	0	low		T.helper.cells	0.785973	-1.09198	0.274842	0.510126	1.21098		TCGA-CQ-5325-01	1	21.8	1	low		T.helper.cells	1.79011	2.20248	0.0276317	1.06621	3.00548		TCGA-HP-A5MZ-01	1	3.03333	2	low		T.helper.cells	1.41706	1.44761	0.147727	0.883931	2.27174		TCGA-L9-A444-01	0	10.2333	1
Tcm	1.32798	1.1126	0.265882	0.805704	2.1888		TCGA-AR-A2LO-01	0	39.9333	0	low		Tcm	0.433965	-3.34984	0.00080857	0.266276	0.707256		TCGA-CQ-7063-01	0	71.1	1	low		Tcm	0.9796	-0.071863	0.942711	0.558367	1.71861		TCGA-RC-A6M5-01	0	0.5	2	low		Tcm	0.650031	-1.77359	0.0761311	0.403841	1.0463		TCGA-MP-A4TJ-01	1	11.3	1
Tem	1.00371	0.0127423	0.989833	0.568067	1.77343		TCGA-B6-A0I2-01	0	145.367	0	low		Tem	0.500834	-2.90482	0.00367464	0.3141	0.79858		TCGA-CR-6481-01	0	10.3667	1	low		Tem	0.842502	-0.574371	0.565717	0.469453	1.51199		TCGA-RC-A7SF-01	0	19.3	2	low		Tem	0.439283	-3.04801	0.00230364	0.258832	0.74554		TCGA-NJ-A4YQ-01	0	47.7333	1
TFH	0.413438	-2.34017	0.0192751	0.197306	0.866321		TCGA-B6-A0I5-01	0	285.2	0	low		TFH	0.415393	-3.44933	0.000561985	0.252152	0.684317		TCGA-CR-6492-01	0	15.9667	1	low		TFH	0.813546	-0.596185	0.551052	0.412822	1.60325		TCGA-WX-AA46-01	0	25.2	2	low		TFH	0.4368	-2.97684	0.00291239	0.253188	0.753568		TCGA-S2-AA1A-01	0	17.1	1
Th17.cells	1.05774	0.304448	0.760786	0.736926	1.51823		TCGA-B6-A0RT-01	0	90.7	0	low		Th17.cells	0.697188	-2.47192	0.0134388	0.523774	0.928018		TCGA-CR-7376-01	0	32.4	1	low		Th17.cells	0.565684	-2.91185	0.00359296	0.385507	0.830073		TCGA-2Y-A9H6-01	0	11.9	3	low		Th17.cells	0.692804	-2.08353	0.0372029	0.490539	0.978469		TCGA-05-4433-01	0	24.3333	2
							TCGA-B6-A401-01	0	86.5333	0	low									TCGA-CR-7385-01	0	33.2333	1	low									TCGA-5C-AAPD-01	0	0.666667	3	low									TCGA-44-4112-01	1	26.9333	2
							TCGA-B6-A408-01	0	69.0667	0	low									TCGA-CR-7395-01	0	31	1	low									TCGA-BC-A10S-01	1	47.4333	3	low									TCGA-44-6146-01	0	24.2667	2
							TCGA-BH-A0B5-01	0	71.2	0	low									TCGA-CV-5971-01	0	23.3667	1	low									TCGA-CC-5259-01	0	8.33333	3	low									TCGA-44-A479-01	0	16.2	2
							TCGA-BH-A0BM-01	0	62.5333	0	low									TCGA-CV-6943-01	1	20.0667	1	low									TCGA-DD-A1EB-01	0	67.2333	3	low									TCGA-49-AARO-01	0	125.3	2
							TCGA-BH-A0E9-01	0	82.9667	0	low									TCGA-CX-A4AQ-01	0	51.8333	1	low									TCGA-DD-A73A-01	0	24.2667	3	low									TCGA-50-5942-01	0	61.5667	2
							TCGA-BH-A0H5-01	0	54	0	low									TCGA-D6-6825-01	0	16.3667	1	low									TCGA-DD-AAD3-01	0	43.1667	3	low									TCGA-50-8459-01	0	37.3	2
							TCGA-BH-A0W5-01	0	42.9333	0	low									TCGA-DQ-7591-01	0	20.7333	1	low									TCGA-DD-AAVQ-01	0	90.9333	3	low									TCGA-50-8460-01	0	27.6333	2
							TCGA-BH-A0W7-01	0	45.4333	0	low									TCGA-DQ-7594-01	0	40.6	1	low									TCGA-DD-AAVW-01	0	77.2333	3	low									TCGA-55-7574-01	1	33.1667	2
							TCGA-BH-A18H-01	0	21.7333	0	low									TCGA-DQ-7596-01	0	42.1667	1	low									TCGA-G3-A25V-01	0	28.6667	3	low									TCGA-55-7725-01	0	14.7333	2
							TCGA-BH-A1EU-01	1	42.8667	0	low									TCGA-MZ-A5BI-01	1	7.23333	1	low									TCGA-2Y-A9HB-01	0	8.66667	4	low									TCGA-55-8096-01	1	23.9667	2
							TCGA-BH-A1FB-01	1	122.3	0	low									TCGA-P3-A5QE-01	0	51.9667	1	low									TCGA-DD-A1EK-01	1	18.6	4	low									TCGA-55-A48X-01	0	22.9667	2
							TCGA-BH-A1FC-01	1	115.733	0	low									TCGA-QK-A6V9-01	0	27.7667	1	low									TCGA-DD-AAD1-01	0	18.8	4	low									TCGA-75-6212-01	1	50.5333	2
							TCGA-BH-A28O-01	0	37.3333	0	low									TCGA-UF-A7JJ-01	0	18.3	1	low									TCGA-DD-AAE3-01	0	18.8667	4	low									TCGA-86-8669-01	0	31.2667	2
							TCGA-BH-A2L8-01	0	20.4	0	low									TCGA-BA-A6DB-01	0	7.2	2	low									TCGA-DD-AAW0-01	0	67.1667	4	low									TCGA-91-8496-01	0	16.8333	2
							TCGA-BH-A8G0-01	0	22.0667	0	low									TCGA-BB-7866-01	0	45.6	2	low									TCGA-DD-AAW1-01	0	66.3	4	low									TCGA-93-A4JQ-01	0	17.5333	2
							TCGA-BH-AB28-01	0	9.56667	0	low									TCGA-CN-4728-01	0	57.4667	2	low									TCGA-G3-A5SM-01	0	17.3333	4	low									TCGA-97-A4M0-01	0	21.7333	2
							TCGA-D8-A141-01	0	20.8667	0	low									TCGA-CN-6013-01	1	24.2333	2	low									TCGA-K7-A5RG-01	0	17.3	4	low									TCGA-L9-A8F4-01	0	15.8667	2
							TCGA-D8-A145-01	0	13.6667	0	low									TCGA-CN-A6V3-01	0	24.7333	2	low									TCGA-XR-A8TD-01	0	34.3333	4	low									TCGA-MP-A4T4-01	1	87.2333	2
							TCGA-D8-A146-01	0	21.4333	0	low									TCGA-CQ-A4CE-01	0	29.9	2	low									TCGA-ZP-A9CY-01	0	26.0667	4	low									TCGA-NJ-A55A-01	0	0.5	2
							TCGA-D8-A1JB-01	0	56.2667	0	low									TCGA-CR-6484-01	0	11.8	2	low									TCGA-ZS-A9CF-01	0	80.4	4	low									TCGA-44-2659-01	0	45.5667	3
							TCGA-D8-A1Y0-01	0	15.7333	0	low									TCGA-CR-7368-01	0	41.5	2	low									TCGA-2Y-A9GZ-01	1	28.2667	5	low									TCGA-44-2666-01	1	3.23333	3
							TCGA-D8-A27I-01	0	14.6333	0	low									TCGA-CR-7374-01	0	1	2	low									TCGA-BD-A2L6-01	0	45.4333	5	low									TCGA-44-2668-01	1	25.3667	3
							TCGA-D8-A27K-01	0	48.7	0	low									TCGA-CR-7402-01	0	30.3667	2	low									TCGA-CC-A9FS-01	0	7.03333	5	low									TCGA-44-3919-01	1	34.2	3
							TCGA-D8-A27L-01	0	16.6333	0	low									TCGA-CV-5430-01	0	141.367	2	low									TCGA-DD-A113-01	0	80.8333	5	low									TCGA-44-6775-01	0	23.5	3
							TCGA-D8-A27T-01	0	13.2667	0	low									TCGA-CV-7101-01	1	5.33333	2	low									TCGA-DD-A115-01	1	84.7333	5	low									TCGA-44-7672-01	0	23.9667	3
							TCGA-E2-A14R-01	0	39.1333	0	low									TCGA-CV-7411-01	1	90.5667	2	low									TCGA-DD-A3A8-01	1	0.366667	5	low									TCGA-49-6744-01	0	56.1	3
							TCGA-E2-A14X-01	0	32.4	0	low									TCGA-CV-A45V-01	1	1.06667	2	low									TCGA-DD-AAEK-01	0	35.5667	5	low									TCGA-50-5066-01	0	48.0667	3
							TCGA-E2-A15C-01	0	23.1333	0	low									TCGA-DQ-7590-01	0	47.1	2	low									TCGA-DD-AAVV-01	0	81.8333	5	low									TCGA-55-6980-01	0	70.3	3
							TCGA-E2-A15E-06	0	21	0	low									TCGA-F7-8489-01	0	21.9333	2	low									TCGA-DD-AAW2-01	0	61.8333	5	low									TCGA-55-7573-01	0	16.2333	3
							TCGA-E2-A15I-01	0	56.4	0	low									TCGA-H7-7774-01	0	13.5667	2	low									TCGA-G3-A7M8-01	0	14.3333	5	low									TCGA-55-7995-01	0	29.6333	3
							TCGA-E2-A1B1-01	0	88.4333	0	low									TCGA-H7-A6C4-01	0	13.8	2	low									TCGA-KR-A7K8-01	0	30.2	5	low									TCGA-55-8206-01	0	29.6	3
							TCGA-E2-A1B5-01	0	32.8	0	low									TCGA-IQ-A61J-01	0	34.0333	2	low									TCGA-BC-A10T-01	1	27.9	6	low									TCGA-62-A46Y-01	1	13.8	3
							TCGA-E2-A1B6-01	0	28.9	0	low									TCGA-KU-A6H8-01	1	10.9	2	low									TCGA-BC-A216-01	0	45.0333	6	low									TCGA-67-6217-01	0	14.0667	3
							TCGA-E2-A1IU-01	0	11.2333	0	low									TCGA-P3-A5Q5-01	0	30.3333	2	low									TCGA-BD-A3ER-01	0	37.1667	6	low									TCGA-69-7761-01	0	6.2	3
							TCGA-E2-A1L7-01	0	61.2	0	low									TCGA-QK-A652-01	0	21.5	2	low									TCGA-DD-AACI-01	0	53.9333	6	low									TCGA-73-4662-01	0	83.8333	3
							TCGA-E2-A1LH-01	0	108.233	0	low									TCGA-TN-A7HL-01	0	20.6333	2	low									TCGA-DD-AACN-01	0	43.4	6	low									TCGA-78-8648-01	1	40.3	3
							TCGA-E2-A3DX-01	0	44.1667	0	low									TCGA-BA-5556-01	0	24.1667	3	low									TCGA-EP-A26S-01	0	20.2667	6	low									TCGA-86-7701-01	0	31.5667	3
							TCGA-E9-A1NC-01	0	40.1	0	low									TCGA-CN-4723-01	0	56.6333	3	low									TCGA-ES-A2HT-01	1	14.6	6	low									TCGA-91-6828-01	0	10.7667	3
							TCGA-E9-A1NE-01	0	36.2667	0	low									TCGA-CN-A497-01	0	35.5	3	low									TCGA-FV-A495-01	0	0.0333333	6	low									TCGA-91-6835-01	0	2.63333	3
							TCGA-E9-A1QZ-01	0	25.1667	0	low									TCGA-CN-A6UY-01	0	23.7667	3	low									TCGA-K7-A6G5-01	0	17.0667	6	low									TCGA-91-6849-01	0	1.16667	3
							TCGA-E9-A1RA-01	0	45.6333	0	low									TCGA-CR-7377-01	1	9.3	3	low									TCGA-NI-A4U2-01	1	59.7	6	low									TCGA-97-A4M6-01	0	18.9333	3
							TCGA-E9-A243-01	0	20.4	0	low									TCGA-CR-7397-01	0	25.1333	3	low									TCGA-ZP-A9D0-01	0	36.3667	6	low									TCGA-MP-A4SW-01	1	59.2667	3
							TCGA-E9-A248-01	0	1.96667	0	low									TCGA-CV-7235-01	0	78.2333	3	low									TCGA-ZP-A9D1-01	0	0.7	6	low									TCGA-O1-A52J-01	1	59.9333	3
							TCGA-E9-A2JT-01	0	9.6	0	low									TCGA-CV-7254-01	1	48.6333	3	low									TCGA-ZS-A9CE-01	0	41.3667	6	low									TCGA-05-4422-01	0	12.1667	4
							TCGA-E9-A3HO-01	0	38.6	0	low									TCGA-CV-A45O-01	0	28.3667	3	low									TCGA-2Y-A9GW-01	1	42.3667	7	low									TCGA-05-4434-01	1	15.2333	4
							TCGA-E9-A3Q9-01	0	33.3667	0	low									TCGA-CV-A45R-01	0	182.667	3	low									TCGA-2Y-A9H4-01	0	48.4	7	low									TCGA-05-5423-01	0	5.03333	4
							TCGA-E9-A3X8-01	0	30.8667	0	low									TCGA-D6-A6EK-01	0	29.1667	3	low									TCGA-3K-AAZ8-01	0	13.2	7	low									TCGA-44-2665-01	0	43.3667	4
							TCGA-E9-A5FK-01	0	27.0667	0	low									TCGA-F7-7848-01	0	37.7	3	low									TCGA-DD-AACE-01	0	72.8	7	low									TCGA-44-3396-01	0	37.6667	4
							TCGA-EW-A1IZ-01	0	18.4667	0	low									TCGA-TN-A7HI-01	0	13.7333	3	low									TCGA-DD-AAEB-01	0	15.9333	7	low									TCGA-49-AAR3-01	0	63.1	4
							TCGA-EW-A1J5-01	0	15.9	0	low									TCGA-UF-A718-01	0	65.7	3	low									TCGA-EP-A12J-01	0	19	7	low									TCGA-50-5068-01	1	49.9667	4
							TCGA-EW-A1J6-01	0	29.1667	0	low									TCGA-BA-6870-01	1	15.0333	4	low									TCGA-ES-A2HS-01	1	22.9333	7	low									TCGA-55-6968-01	1	43.1	4
							TCGA-EW-A1OV-01	0	26.3	0	low									TCGA-CN-6996-01	1	17.6667	4	low									TCGA-G3-A3CJ-01	0	19.8	7	low									TCGA-55-6969-01	0	41.3	4
							TCGA-EW-A1P7-01	0	30.5	0	low									TCGA-CR-7371-01	1	3.13333	4	low									TCGA-KR-A7K0-01	1	2.16667	7	low									TCGA-55-6985-01	0	41.1	4
							TCGA-EW-A2FS-01	0	53.4667	0	low									TCGA-CR-7382-01	0	26.5333	4	low									TCGA-KR-A7K2-01	0	27.6333	7	low									TCGA-55-A4DF-01	1	20.4667	4
							TCGA-EW-A3U0-01	0	17.7333	0	low									TCGA-CV-7248-01	1	17.3667	4	low									TCGA-O8-A75V-01	0	17.9333	7	low									TCGA-62-A46R-01	1	57.5	4
							TCGA-EW-A6SB-01	0	25.3333	0	low									TCGA-CN-4734-01	0	56.3333	5	low									TCGA-ZS-A9CD-01	1	46.2	7	low									TCGA-67-3771-01	0	20.3333	4
							TCGA-GM-A2DA-01	1	219.767	0	low									TCGA-CN-4741-01	0	74.6333	5	low									TCGA-2Y-A9GU-01	0	64.6333	8	low									TCGA-67-3772-01	0	19.1	4
							TCGA-GM-A2DF-01	0	71.8333	0	low									TCGA-CQ-7071-01	0	43.7	5	low									TCGA-2Y-A9H1-01	1	40.9667	8	low									TCGA-91-A4BD-01	0	20.1	4
							TCGA-GM-A2DI-01	0	86.3333	0	low									TCGA-CR-6480-01	0	12.0667	5	low									TCGA-2Y-A9H9-01	0	23.2333	8	low									TCGA-97-7546-01	0	42.8333	4
							TCGA-GM-A2DN-01	0	103.033	0	low									TCGA-CV-5434-01	1	110.467	5	low									TCGA-CC-A7IH-01	0	12.1667	8	low									TCGA-97-8174-01	1	5.46667	4
							TCGA-GM-A2DO-01	0	86.5333	0	low									TCGA-CV-5444-01	0	81.2333	5	low									TCGA-DD-A11A-01	0	2.63333	8	low									TCGA-05-4382-01	0	20.2333	5
							TCGA-GM-A3NY-01	0	38.7333	0	low									TCGA-CV-6955-01	1	11.1333	5	low									TCGA-DD-AADI-01	0	36.1667	8	low									TCGA-38-4626-01	0	122.467	5
							TCGA-HN-A2NL-01	0	2.63333	0	low									TCGA-CV-7424-01	1	15.1	5	low									TCGA-DD-AADP-01	0	15.2667	8	low									TCGA-44-7659-01	0	23.0333	5
							TCGA-LD-A66U-01	0	21.5333	0	low									TCGA-CV-7425-01	1	57.2667	5	low									TCGA-DD-AADQ-01	0	14.5333	8	low									TCGA-44-A4SU-01	1	13.6333	5
							TCGA-LL-A441-01	0	33.2	0	low									TCGA-D6-6516-01	0	25.7667	5	low									TCGA-ED-A7XP-01	0	13.3333	8	low									TCGA-49-AAR4-01	1	29.3	5
							TCGA-LL-A5YN-01	0	14.9	0	low									TCGA-D6-A4ZB-01	0	12.5333	5	low									TCGA-G3-A3CG-01	0	22.4333	8	low									TCGA-55-6642-01	0	81.6333	5
							TCGA-LL-A7SZ-01	0	19.8	0	low									TCGA-F7-A620-01	0	18.1	5	low									TCGA-G3-AAV2-01	0	12.4	8	low									TCGA-55-7724-01	0	23.5	5
							TCGA-LL-A8F5-01	0	19.8667	0	low									TCGA-IQ-A61I-01	1	0.0666667	5	low									TCGA-GJ-A3OU-01	0	29.3	8	low									TCGA-55-7816-01	1	15.6	5
							TCGA-OK-A5Q2-01	0	2.13333	0	low									TCGA-T2-A6X0-01	0	7.2	5	low									TCGA-MI-A75H-01	0	24.9	8	low									TCGA-55-7907-01	1	11.4333	5
							TCGA-OL-A5DA-01	0	59.4333	0	low									TCGA-BA-A4IH-01	0	20.7333	6	low									TCGA-RC-A7SB-01	0	19.6	8	low									TCGA-55-7911-01	0	17.9	5
							TCGA-OL-A5RU-01	0	40.6333	0	low									TCGA-CN-4740-01	1	27.9667	6	low									TCGA-2Y-A9H5-01	1	18.5	9	low									TCGA-55-8508-01	0	20.5667	5
							TCGA-OL-A66I-01	0	23.8	0	low									TCGA-CN-5356-01	0	46.9667	6	low									TCGA-DD-A11B-01	1	0.466667	9	low									TCGA-55-8512-01	1	20.2333	5
							TCGA-OL-A66P-01	0	14.2667	0	low									TCGA-CQ-5331-01	0	46.6333	6	low									TCGA-FV-A496-01	0	0.333333	9	low									TCGA-62-A46U-01	0	68.9	5
							TCGA-S3-A6ZG-01	0	18.7333	0	low									TCGA-CQ-6223-01	0	47.6	6	low									TCGA-DD-A118-01	0	114.567	10	low									TCGA-62-A472-01	0	30.3333	5
							TCGA-S3-AA15-01	0	17.5	0	low									TCGA-CQ-7068-01	0	43.6333	6	low									TCGA-DD-A11D-01	1	52	10	low									TCGA-67-3773-01	0	14.2333	5
							TCGA-S3-AA17-01	0	14.1333	0	low									TCGA-CR-7373-01	0	29.6333	6	low									TCGA-DD-A1EI-01	0	6.1	10	low									TCGA-67-3774-01	0	12.8333	5
							TCGA-WT-AB41-01	0	53.7	0	low									TCGA-CR-7389-01	0	13.0667	6	low									TCGA-DD-A39V-01	1	21.4333	10	low									TCGA-69-7978-01	0	4.46667	5
							TCGA-XX-A899-01	0	15.5667	0	low									TCGA-CV-7178-01	1	72.2	6	low									TCGA-DD-A39W-01	1	27.5667	10	low									TCGA-78-7539-01	0	26.3667	5
							TCGA-3C-AALK-01	0	48.2667	1	low									TCGA-D6-6515-01	1	13.4333	6	low									TCGA-DD-AAD8-01	0	40.6333	10	low									TCGA-86-8668-01	0	14.1	5
							TCGA-4H-AAAK-01	0	11.6	1	low									TCGA-D6-6824-01	0	2.56667	6	low									TCGA-DD-AADJ-01	0	35.5333	10	low									TCGA-91-A4BC-01	0	1.46667	5
							TCGA-A1-A0SF-01	0	48.7667	1	low									TCGA-HD-8314-01	0	22.3333	6	low									TCGA-ED-A5KG-01	0	28.4667	10	low									TCGA-97-A4M1-01	0	20.0333	5
							TCGA-A2-A04N-01	0	145.133	1	low									TCGA-UF-A7JH-01	0	29.8667	6	low									TCGA-ED-A7PY-01	0	13	10	low									TCGA-99-7458-01	0	24.9	5
							TCGA-A2-A04T-01	0	74.8667	1	low									TCGA-4P-AA8J-01	0	3.4	7	low									TCGA-ED-A8O5-01	0	13.5333	10	low									TCGA-J2-A4AG-01	0	32.9333	5
							TCGA-A2-A04X-01	0	56.2	1	low									TCGA-BA-5557-01	0	20.7667	7	low									TCGA-G3-A5SL-01	0	20.7	10	low									TCGA-NJ-A55O-01	0	0.433333	5
							TCGA-A2-A0CK-01	0	138.633	1	low									TCGA-BA-5558-01	0	66.5	7	low									TCGA-RC-A7S9-01	0	21.3333	10	low									TCGA-05-4417-01	0	15.1667	6
							TCGA-A2-A0CY-01	0	55.7667	1	low									TCGA-BB-4228-01	0	18.6333	7	low									TCGA-UB-AA0U-01	0	10.9	10	low									TCGA-44-3398-01	0	38.7667	6
							TCGA-A2-A0CZ-01	0	53.8667	1	low									TCGA-CN-6016-01	0	48.1	7	low									TCGA-WX-AA47-01	1	18.5333	10	low									TCGA-49-4505-01	1	14.2667	6
							TCGA-A2-A0D3-01	0	62.4333	1	low									TCGA-CN-6023-01	0	52.8	7	low									TCGA-ZP-A9CV-01	1	36.2667	10	low									TCGA-49-4512-01	1	30.1667	6
							TCGA-A2-A0EO-01	0	81.4	1	low									TCGA-CQ-6222-01	0	67.2	7	low									TCGA-CC-A7IF-01	1	21.6333	11	low									TCGA-49-AAR2-01	0	74.1333	6
							TCGA-A2-A0EP-01	0	120.1	1	low									TCGA-CQ-7072-01	0	78.6333	7	low									TCGA-DD-A3A4-01	1	20.4	11	low									TCGA-55-7284-01	1	8.1	6
							TCGA-A2-A0ES-01	0	73	1	low									TCGA-CR-6488-01	0	12.6333	7	low									TCGA-DD-A3A9-01	1	31.0333	11	low									TCGA-55-7910-01	0	34.6667	6
							TCGA-A2-A0EW-01	1	62.8	1	low									TCGA-CV-6934-01	1	2.16667	7	low									TCGA-DD-AACW-01	0	47.4667	11	low									TCGA-55-7994-01	0	20.1	6
							TCGA-A2-A0EX-01	0	25.0667	1	low									TCGA-CV-6953-01	1	54.7	7	low									TCGA-ED-A97K-01	0	0.2	11	low									TCGA-55-8092-01	1	5.13333	6
							TCGA-A2-A0EY-01	0	64.1667	1	low									TCGA-CV-7427-01	1	158.667	7	low									TCGA-EP-A2KB-01	1	19.8667	11	low									TCGA-55-8203-01	0	18.2333	6
							TCGA-A2-A0SW-01	1	45.5	1	low									TCGA-CV-7428-01	1	55.7	7	low									TCGA-FV-A4ZP-01	1	82.8667	11	low									TCGA-55-8207-01	0	32.5667	6
							TCGA-A2-A0YL-01	0	49.1333	1	low									TCGA-CV-A45P-01	0	21.3	7	low									TCGA-G3-A25U-01	0	54.5333	11	low									TCGA-62-A46S-01	1	55.1	6
							TCGA-A2-A1G6-01	0	16.7	1	low									TCGA-CV-A461-01	1	68.8	7	low									TCGA-G3-A6UC-01	0	22.3667	11	low									TCGA-64-1681-01	1	38.9	6
							TCGA-A2-A25A-01	0	109.2	1	low									TCGA-CV-A6JY-01	0	21.5333	7	low									TCGA-ZS-A9CF-02	0	80.4	11	low									TCGA-64-5778-01	0	43.5	6
							TCGA-A2-A25F-01	0	10.7333	1	low									TCGA-CV-A6JZ-01	0	23.8	7	low									TCGA-BC-A10R-01	1	10.2667	12	low									TCGA-64-5779-01	0	28.8	6
							TCGA-A2-A3XW-01	0	57.0667	1	low									TCGA-D6-6826-01	1	11.6	7	low									TCGA-DD-A116-01	1	54.0667	12	low									TCGA-67-3770-01	0	20.3333	6
							TCGA-A2-A3Y0-01	0	51.5333	1	low									TCGA-D6-6827-01	0	18.9333	7	low									TCGA-DD-A1EC-01	0	20.0667	12	low									TCGA-67-6216-01	0	4.7	6
							TCGA-A2-A4RW-01	0	7.4	1	low									TCGA-D6-A74Q-01	0	23.6667	7	low									TCGA-DD-A3A3-01	1	17.8333	12	low									TCGA-69-A59K-01	0	19.7	6
							TCGA-A2-A4RX-01	0	24.7333	1	low									TCGA-KU-A6H7-06	0	19.5333	7	low									TCGA-DD-A4NO-01	0	74.8333	12	low									TCGA-86-A456-01	0	29.8667	6
							TCGA-A2-A4S2-01	0	21.4333	1	low									TCGA-UF-A7JS-01	1	22.6667	7	low									TCGA-DD-AACF-01	1	12.1667	12	low									TCGA-93-A4JP-01	0	19.2667	6
							TCGA-A7-A0DB-01	0	33.5667	1	low									TCGA-BA-5151-01	0	24.0667	8	low									TCGA-DD-AACO-01	0	62.5333	12	low									TCGA-95-A4VN-01	0	18.4333	6
							TCGA-A7-A0DC-01	0	30.2	1	low									TCGA-BA-A4IG-01	0	28.5	8	low									TCGA-DD-AADR-01	0	67.6	12	low									TCGA-97-7941-01	0	16.1333	6
							TCGA-A7-A13D-01	0	32.1667	1	low									TCGA-BB-8596-01	0	72.0333	8	low									TCGA-DD-AAEA-01	0	19.1667	12	low									TCGA-J2-8192-01	0	24.6333	6
							TCGA-A7-A13H-01	0	29.9667	1	low									TCGA-CN-4729-01	0	13.0667	8	low									TCGA-WQ-AB4B-01	0	13.1667	12	low									TCGA-MP-A4T6-01	1	59.6667	6
							TCGA-A7-A26H-01	0	24.1333	1	low									TCGA-CN-A49C-01	0	21.5	8	low									TCGA-2Y-A9H2-01	0	57.7	13	low									TCGA-MP-A4TK-01	1	19.4	6
							TCGA-A7-A26I-01	0	22.0333	1	low									TCGA-CQ-5327-01	0	55.3333	8	low									TCGA-4R-AA8I-01	1	8.73333	13	low									TCGA-05-4384-01	0	14.2	7
							TCGA-A7-A2KD-01	0	22.6333	1	low									TCGA-CR-6478-01	1	6.1	8	low									TCGA-BC-A3KF-01	0	0.266667	13	low									TCGA-05-4403-01	0	19.2667	7
							TCGA-A7-A426-01	0	12.1333	1	low									TCGA-CR-7369-01	1	36.3333	8	low									TCGA-DD-A114-01	1	38.3	13	low									TCGA-35-4122-01	0	7.5	7
							TCGA-A8-A07U-01	0	25.3333	1	low									TCGA-CR-7386-01	0	47.6667	8	low									TCGA-DD-A39Z-01	1	20.0333	13	low									TCGA-44-6777-01	1	32.9	7
							TCGA-A8-A08B-01	0	38.5333	1	low									TCGA-CV-7433-01	1	20.0333	8	low									TCGA-DD-A3A5-01	1	104.167	13	low									TCGA-49-4487-01	1	28.5	7
							TCGA-A8-A08I-01	0	12.1667	1	low									TCGA-CV-A45U-01	1	35.9667	8	low									TCGA-DD-AADO-01	0	15.1	13	low									TCGA-49-4510-01	1	29.8667	7
							TCGA-A8-A091-01	0	33.4667	1	low									TCGA-CV-A6JT-01	0	28.4	8	low									TCGA-DD-AADV-01	0	19.1333	13	low									TCGA-50-6597-01	1	42.2667	7
							TCGA-A8-A09Q-01	0	25.3667	1	low									TCGA-F7-A50J-01	0	31.5667	8	low									TCGA-DD-AAVS-01	0	60.7667	13	low									TCGA-55-6983-01	0	94.1	7
							TCGA-A8-A09V-01	0	15.2333	1	low									TCGA-F7-A623-01	0	20.5333	8	low									TCGA-G3-A7M7-01	0	12.0333	13	low									TCGA-55-7227-01	1	31.7333	7
							TCGA-A8-A0A7-01	0	1	1	low									TCGA-HD-7229-01	0	34.2333	8	low									TCGA-G3-AAV3-01	0	13.7333	13	low									TCGA-55-7281-01	0	29.0667	7
							TCGA-AC-A23C-01	0	19.5	1	low									TCGA-MT-A67D-01	0	1.86667	8	low									TCGA-T1-A6J8-01	0	0.766667	13	low									TCGA-55-8085-01	0	30.1333	7
							TCGA-AC-A2BM-01	0	100.733	1	low									TCGA-QK-A6IJ-01	0	12.9	8	low									TCGA-XR-A8TC-01	0	44.6333	13	low									TCGA-55-8090-01	1	19.9333	7
							TCGA-AC-A3TM-01	0	25.4	1	low									TCGA-QK-AA3J-01	0	15.5333	8	low									TCGA-2Y-A9H7-01	0	38.9333	14	low									TCGA-55-8299-01	1	15.6333	7
							TCGA-AC-A3W7-01	0	15.7	1	low									TCGA-WA-A7H4-01	0	14.7667	8	low									TCGA-2Y-A9H8-01	1	21.1	14	low									TCGA-55-A48Z-01	0	21.7	7
							TCGA-AC-A6IV-01	0	18.9333	1	low									TCGA-BB-A6UM-01	0	13.1	9	low									TCGA-BC-4073-01	0	28.3	14	low									TCGA-73-7498-01	0	39.6333	7
							TCGA-AC-A8OP-01	0	20.4667	1	low									TCGA-C9-A480-01	0	12.8667	9	low									TCGA-CC-5261-01	1	3.23333	14	low									TCGA-86-7954-01	0	20.1667	7
							TCGA-AC-A8OS-01	0	2.33333	1	low									TCGA-CN-4737-01	0	20.8333	9	low									TCGA-CC-A7IE-01	1	7.23333	14	low									TCGA-86-8585-01	0	11.7667	7
							TCGA-AN-A03Y-01	0	0.333333	1	low									TCGA-CN-6019-01	0	34.6	9	low									TCGA-DD-A1EG-01	1	45.7333	14	low									TCGA-93-7348-01	0	17.7	7
							TCGA-AN-A046-01	0	0.333333	1	low									TCGA-CN-A499-01	0	23.9	9	low									TCGA-DD-A39X-01	1	56.4667	14	low									TCGA-95-8039-01	0	27.6667	7
							TCGA-AN-A0FN-01	0	7.26667	1	low									TCGA-CR-6491-01	0	23.1	9	low									TCGA-DD-A4NE-01	1	22	14	low									TCGA-95-A4VP-01	0	20.1667	7
							TCGA-AN-A0XS-01	0	0.333333	1	low									TCGA-CV-5439-01	1	18.2	9	low									TCGA-DD-A4NF-01	0	31.4	14	low									TCGA-97-7547-01	0	65.5	7
							TCGA-AN-A0XV-01	0	5.4	1	low									TCGA-CV-6436-01	0	63.3	9	low									TCGA-FV-A23B-01	1	61.7333	14	low									TCGA-L9-A50W-01	1	14.7333	7
							TCGA-AO-A0J4-01	0	52.9	1	low									TCGA-CV-6948-01	1	42.9667	9	low									TCGA-G3-A25X-01	0	59.3	14	low									TCGA-MP-A4TI-01	1	14.3	7
							TCGA-AO-A0J9-01	0	53.7667	1	low									TCGA-CV-6952-01	1	6.16667	9	low									TCGA-LG-A9QC-01	0	14.1667	14	low									TCGA-44-6145-01	0	19.8333	8
							TCGA-AO-A0JI-01	0	50.9333	1	low									TCGA-CV-6959-01	1	8.53333	9	low									TCGA-MI-A75G-01	0	23.2667	14	low									TCGA-49-4501-01	1	47.3667	8
							TCGA-AO-A125-01	0	115.2	1	low									TCGA-CV-A463-01	1	0.766667	9	low									TCGA-UB-A7ME-01	0	16.2	14	low									TCGA-49-AAR0-01	0	158.833	8
							TCGA-AO-A126-01	0	110.233	1	low									TCGA-D6-A6EN-01	0	22.9	9	low									TCGA-ZP-A9D4-01	0	13.1667	14	low									TCGA-49-AARQ-01	0	224.4	8
							TCGA-AO-A1KQ-01	0	62.7333	1	low									TCGA-D6-A6EQ-01	0	12.2667	9	low									TCGA-5C-A9VH-01	0	10.7333	15	low									TCGA-53-7813-01	0	14.1333	8
							TCGA-AO-A1KS-01	0	11.6667	1	low									TCGA-HL-7533-01	0	35.2333	9	low									TCGA-DD-A119-01	1	7.43333	15	low									TCGA-55-1592-01	1	23.3667	8
							TCGA-AQ-A54N-01	0	2.6	1	low									TCGA-KU-A6H7-01	0	19.5333	9	low									TCGA-DD-A1EA-01	0	80.5	15	low									TCGA-55-6970-01	1	15.4667	8
							TCGA-AR-A0TT-01	0	110.533	1	low									TCGA-QK-A8Z9-01	1	14.9667	9	low									TCGA-DD-A73G-01	0	115.933	15	low									TCGA-55-7727-01	0	3.96667	8
							TCGA-AR-A0TX-01	0	65.7333	1	low									TCGA-QK-A8ZB-01	0	18.0667	9	low									TCGA-DD-AACB-01	0	77.4667	15	low									TCGA-55-8091-01	0	20	8
							TCGA-AR-A1AI-01	0	109.867	1	low									TCGA-QK-AA3K-01	0	8.43333	9	low									TCGA-DD-AAVY-01	0	65.6667	15	low									TCGA-55-A491-01	0	20.8667	8
							TCGA-AR-A1AJ-01	0	102.4	1	low									TCGA-BA-4077-01	1	37.8	10	low									TCGA-FV-A2QQ-01	0	24.3	15	low									TCGA-69-7765-01	0	5.5	8
							TCGA-AR-A1AL-01	0	99.0333	1	low									TCGA-BA-4078-01	1	9.2	10	low									TCGA-UB-A7MB-01	0	20.0333	15	low									TCGA-69-7974-01	0	6.13333	8
							TCGA-AR-A24O-01	0	120.233	1	low									TCGA-BA-A6DG-01	1	2.3	10	low									TCGA-XR-A8TG-01	0	29.9333	15	low									TCGA-73-7499-01	1	51.0333	8
							TCGA-AR-A24S-01	0	99.2	1	low									TCGA-CN-4736-01	1	13.1667	10	low									TCGA-BC-4072-01	1	49.6667	16	low									TCGA-78-7143-01	1	165.367	8
							TCGA-AR-A24U-01	0	104.267	1	low									TCGA-CN-5370-01	1	8.63333	10	low									TCGA-BW-A5NO-01	0	0.666667	16	low									TCGA-78-7162-01	1	105.633	8
							TCGA-AR-A254-01	0	86.8333	1	low									TCGA-CN-6018-01	1	19.3333	10	low									TCGA-DD-AACV-01	0	51.0333	16	low									TCGA-97-7554-01	0	25.8333	8
							TCGA-AR-A2LJ-01	0	87.7333	1	low									TCGA-CN-6021-01	1	9.2	10	low									TCGA-DD-AADG-01	0	38.1667	16	low									TCGA-97-A4M5-01	0	21.1333	8
							TCGA-AR-A2LM-01	0	64.5	1	low									TCGA-CN-6994-01	0	39.4333	10	low									TCGA-DD-AADN-01	0	29.9333	16	low									TCGA-99-8032-01	0	1.46667	8
							TCGA-B6-A0IH-01	1	113.933	1	low									TCGA-CN-A641-01	0	12.2333	10	low									TCGA-DD-AADU-01	0	18.4667	16	low									TCGA-MP-A4TD-01	1	10.2333	8
							TCGA-B6-A0IQ-01	0	142.833	1	low									TCGA-CQ-5334-01	1	4.3	10	low									TCGA-DD-AAEI-01	0	51.0333	16	low									TCGA-NJ-A4YG-01	0	75.3667	8
							TCGA-B6-A0RM-01	1	79.1	1	low									TCGA-CV-7104-01	1	13.1	10	low									TCGA-DD-AAVP-01	0	91.7333	16	low									TCGA-NJ-A55R-01	0	20.1	8
							TCGA-B6-A0RV-01	0	171.867	1	low									TCGA-CV-A45X-01	1	6.6	10	low									TCGA-DD-AAVZ-01	0	63.3333	16	low									TCGA-05-4398-01	0	47.7	9
							TCGA-B6-A0WX-01	1	21.3	1	low									TCGA-DQ-5625-01	1	37.7667	10	low									TCGA-G3-A25Z-01	0	21.8333	16	low									TCGA-05-4424-01	0	30.4333	9
							TCGA-B6-A1KC-01	0	44.2	1	low									TCGA-HD-8634-01	1	12.8333	10	low									TCGA-G3-A3CK-01	0	19.5	16	low									TCGA-44-A47A-01	0	15.5333	9
							TCGA-B6-A3ZX-01	1	38.4	1	low									TCGA-MT-A67A-01	0	30.4667	10	low									TCGA-GJ-A9DB-01	1	2.23333	16	low									TCGA-55-6712-01	1	5.7	9
							TCGA-BH-A0B9-01	0	52.4	1	low									TCGA-T2-A6X2-01	0	32.9	10	low									TCGA-MI-A75C-01	0	9.7	16	low									TCGA-55-8097-01	0	15.8667	9
							TCGA-BH-A0BA-01	0	37.7333	1	low									TCGA-BA-A6DD-01	1	5.76667	11	low									TCGA-2Y-A9H0-01	0	122.5	17	low									TCGA-55-8511-01	0	18.4	9
							TCGA-BH-A0BF-01	1	44.1333	1	low									TCGA-CN-5355-01	0	42.6	11	low									TCGA-CC-A123-01	0	7.3	17	low									TCGA-55-8514-01	0	17.3333	9
							TCGA-BH-A0C0-01	0	42.3333	1	low									TCGA-CN-6022-01	1	9.36667	11	low									TCGA-DD-AAD6-01	0	22.4	17	low									TCGA-55-8616-01	0	1.6	9
							TCGA-BH-A0DK-01	0	14.1	1	low									TCGA-CN-A49A-01	1	17.5333	11	low									TCGA-DD-AADM-01	1	0.4	17	low									TCGA-55-A493-01	0	0.933333	9
							TCGA-BH-A0DO-01	0	54.8	1	low									TCGA-CN-A642-01	1	2.73333	11	low									TCGA-EP-A2KA-01	1	20.9	17	low									TCGA-55-A57B-01	0	18.2	9
							TCGA-BH-A0DP-01	0	15.8667	1	low									TCGA-CQ-5330-01	0	63.2333	11	low									TCGA-EP-A2KC-01	1	0.633333	17	low									TCGA-64-1676-01	0	57.6	9
							TCGA-BH-A0DT-01	0	80.1	1	low									TCGA-CQ-5333-01	1	11.3667	11	low									TCGA-G3-A5SJ-01	0	23.2667	17	low									TCGA-69-7764-01	0	13.8	9
							TCGA-BH-A0HK-01	0	5.93333	1	low									TCGA-CR-6472-01	0	35	11	low									TCGA-PD-A5DF-01	1	21.3	17	low									TCGA-73-4658-01	1	53.3333	9
							TCGA-BH-A0HP-01	0	13.8	1	low									TCGA-CR-7399-01	0	6.03333	11	low									TCGA-RC-A7SK-01	0	15.7333	17	low									TCGA-75-5146-01	0	78.9333	9
							TCGA-BH-A18I-01	0	36.4333	1	low									TCGA-CV-7446-01	1	36.4333	11	low									TCGA-XR-A8TE-01	0	30.8333	17	low									TCGA-78-7160-01	1	23.2333	9
							TCGA-BH-A18Q-01	1	56.4	1	low									TCGA-CV-7568-01	1	30.9	11	low									TCGA-XR-A8TF-01	1	23.1	17	low									TCGA-91-6830-01	0	2	9
							TCGA-BH-A18V-06	1	51.8667	1	low									TCGA-CV-A45Z-01	1	48.8667	11	low									TCGA-BC-A69H-01	0	14.8	18	low									TCGA-93-A4JN-01	0	23.9333	9
							TCGA-BH-A1F0-01	1	26.1667	1	low									TCGA-CV-A464-01	0	57.4	11	low									TCGA-CC-5262-01	1	3.43333	18	low									TCGA-05-4389-01	0	45.6333	10
							TCGA-BH-A1FE-01	1	75.7667	1	low									TCGA-CV-A6JE-01	0	35.8333	11	low									TCGA-CC-A5UC-01	1	11.5667	18	low									TCGA-05-4425-01	0	22.3	10
							TCGA-BH-A209-01	1	131.967	1	low									TCGA-CX-7219-01	0	34.8333	11	low									TCGA-DD-A1EH-01	0	49.8333	18	low									TCGA-05-4432-01	0	25.3667	10
							TCGA-BH-A42U-01	0	112.133	1	low									TCGA-D6-A6EP-01	0	14.1333	11	low									TCGA-DD-A3A7-01	1	13.9667	18	low									TCGA-38-4632-01	1	45.2333	10
							TCGA-BH-A42V-01	0	21.1667	1	low									TCGA-DQ-5624-01	0	59.2667	11	low									TCGA-DD-A73B-01	1	9.43333	18	low									TCGA-44-5643-01	0	33.7667	10
							TCGA-BH-A8FZ-01	0	19.1333	1	low									TCGA-F7-A61S-01	0	19.2	11	low									TCGA-DD-A73D-01	0	23.1	18	low									TCGA-44-A4SS-01	0	13.8333	10
							TCGA-C8-A12V-01	0	12.8333	1	low									TCGA-F7-A61V-01	0	25.3	11	low									TCGA-DD-AACG-01	1	15.6333	18	low									TCGA-49-4506-01	1	33.3	10
							TCGA-C8-A12X-01	0	12.8333	1	low									TCGA-HD-8635-01	0	23.1667	11	low									TCGA-DD-AACS-01	0	60.1333	18	low									TCGA-49-AARE-01	1	40.9667	10
							TCGA-C8-A132-01	0	12.7667	1	low									TCGA-MT-A51W-01	0	14.5667	11	low									TCGA-DD-AADF-01	1	3.83333	18	low									TCGA-49-AARN-01	1	37.8333	10
							TCGA-C8-A138-01	0	12.6667	1	low									TCGA-QK-A8Z7-01	0	13.0667	11	low									TCGA-DD-AAEG-01	0	23.9667	18	low									TCGA-50-6590-01	1	42.9333	10
							TCGA-C8-A1HM-01	0	12.5	1	low									TCGA-T2-A6WX-01	1	6.96667	11	low									TCGA-ED-A66X-01	0	13.5333	18	low									TCGA-55-8089-01	1	23.4	10
							TCGA-C8-A26W-01	0	12.7	1	low									TCGA-UF-A7JO-01	1	21.0333	11	low									TCGA-ED-A7PX-01	0	0.2	18	low									TCGA-55-8620-01	1	12.5	10
							TCGA-C8-A26X-01	0	12.5333	1	low									TCGA-BA-5555-01	0	17.3333	12	low									TCGA-EP-A3RK-01	0	12.1	18	low									TCGA-64-5815-01	0	28.8667	10
							TCGA-C8-A3M7-01	1	34.4667	1	low									TCGA-BA-6869-01	0	21.4667	12	low									TCGA-G3-A25Y-01	1	15.0667	18	low									TCGA-69-8255-01	0	4.3	10
							TCGA-C8-A8HP-01	0	13.2	1	low									TCGA-BA-6871-01	1	3.6	12	low									TCGA-G3-A5SI-01	1	25.6	18	low									TCGA-75-5147-01	0	44.4333	10
							TCGA-D8-A140-01	0	13.4333	1	low									TCGA-BA-A6DA-01	0	11.7	12	low									TCGA-GJ-A6C0-01	1	1.03333	18	low									TCGA-78-7149-01	0	131.333	10
							TCGA-D8-A147-01	0	19.4667	1	low									TCGA-BA-A6DI-01	1	11.2	12	low									TCGA-KR-A7K7-01	0	31.7	18	low									TCGA-78-7535-01	1	31.6333	10
							TCGA-D8-A1XO-01	0	56.0667	1	low									TCGA-BA-A6DL-01	0	20.7667	12	low									TCGA-UB-A7MD-01	1	1.73333	18	low									TCGA-86-8075-01	1	23.1333	10
							TCGA-D8-A27M-01	0	13.6667	1	low									TCGA-CN-A63T-01	0	7.5	12	low									TCGA-UB-A7MF-01	1	7.13333	18	low									TCGA-95-A4VK-01	0	21.7	10
							TCGA-D8-A4Z1-01	0	21.9667	1	low									TCGA-CQ-6218-01	0	41.7667	12	low									TCGA-WJ-A86L-01	0	11.5	18	low									TCGA-97-8171-01	0	18.9333	10
							TCGA-D8-A73U-01	0	16.4	1	low									TCGA-CR-6477-01	0	17.1333	12	low									TCGA-BC-A10Q-01	1	37.8333	19	low									TCGA-L4-A4E5-01	0	19.2667	10
							TCGA-E2-A10C-01	0	40.6667	1	low									TCGA-CR-7372-01	0	25.3	12	low									TCGA-BC-A10Y-01	1	23.7	19	low									TCGA-MP-A4SV-01	1	87.3333	10
							TCGA-E2-A14U-01	0	43.9333	1	low									TCGA-CR-7398-01	0	5.2	12	low									TCGA-BC-A8YO-01	0	18.7333	19	low									TCGA-05-5425-01	0	29.4	11
							TCGA-E2-A14Z-01	1	18.7667	1	low									TCGA-CR-7401-01	0	35.9	12	low									TCGA-CC-A7IJ-01	0	12.7333	19	low									TCGA-05-5428-01	0	22.3333	11
							TCGA-E2-A158-01	0	15	1	low									TCGA-CV-5442-01	0	77.5667	12	low									TCGA-DD-A4NA-01	0	33.6	19	low									TCGA-35-4123-01	0	6.06667	11
							TCGA-E2-A15E-01	0	21	1	low									TCGA-CV-6933-01	1	91.3667	12	low									TCGA-DD-AACU-01	0	52.2333	19	low									TCGA-50-5930-01	1	9.4	11
							TCGA-E2-A15M-01	1	11.2	1	low									TCGA-CV-6941-01	1	11.4	12	low									TCGA-DD-AAED-01	0	25.4333	19	low									TCGA-50-5939-01	1	15.3333	11
							TCGA-E2-A1AZ-01	0	77.6333	1	low									TCGA-CV-7407-01	1	36.0333	12	low									TCGA-FV-A3I0-01	0	28.2667	19	low									TCGA-50-5941-01	0	49.1333	11
							TCGA-E2-A1IH-01	0	34.2	1	low									TCGA-CV-7418-01	1	26.3	12	low									TCGA-FV-A4ZQ-01	0	0.4	19	low									TCGA-53-A4EZ-01	0	35.7	11
							TCGA-E2-A1IJ-01	0	28.8333	1	low									TCGA-CV-A45Q-01	1	171.733	12	low									TCGA-RC-A7SH-01	0	15.6	19	low									TCGA-55-6982-01	1	33.1667	11
							TCGA-E2-A1IO-01	0	61.8333	1	low									TCGA-CV-A6JN-01	0	30.2	12	low									TCGA-UB-A7MA-01	0	28.2667	19	low									TCGA-55-6986-01	0	108.7	11
							TCGA-E2-A1LG-01	0	50.7667	1	low									TCGA-F7-A50I-01	0	3.06667	12	low									TCGA-BC-A217-01	1	46.5667	20	low									TCGA-55-7815-01	0	25.7667	11
							TCGA-E2-A1LI-01	0	104.033	1	low									TCGA-IQ-7631-01	0	39.0667	12	low									TCGA-CC-5258-01	1	4.3	20	low									TCGA-55-8615-01	0	14.8667	11
							TCGA-E9-A1N5-01	0	37.3333	1	low									TCGA-MT-A7BN-01	0	15.6333	12	low									TCGA-CC-A3MA-01	1	10.1	20	low									TCGA-75-5125-01	1	67.5667	11
							TCGA-E9-A1R0-01	0	28.6667	1	low									TCGA-QK-A6II-01	1	9.46667	12	low									TCGA-CC-A7IL-01	1	9.26667	20	low									TCGA-78-7540-01	1	39.9	11
							TCGA-E9-A54Y-01	0	24.1667	1	low									TCGA-T3-A92M-01	0	13.9	12	low									TCGA-DD-A1EF-01	1	13.1333	20	low									TCGA-80-5608-01	0	94.4	11
							TCGA-EW-A1IY-01	0	8.6	1	low									TCGA-BA-A4II-01	0	30.6	13	low									TCGA-DD-A3A1-01	1	7.76667	20	low									TCGA-83-5908-01	0	27.4667	11
							TCGA-EW-A1PA-01	0	19.1667	1	low									TCGA-CN-A498-01	1	25.7667	13	low									TCGA-DD-A4NJ-01	0	30.9333	20	low									TCGA-86-7714-01	1	20.8333	11
							TCGA-EW-A3E8-01	0	34.5	1	low									TCGA-CN-A63U-01	0	32.1333	13	low									TCGA-DD-AACJ-01	0	70.0667	20	low									TCGA-97-8175-01	0	18.3667	11
							TCGA-GM-A2DB-01	0	80.2	1	low									TCGA-CN-A63V-01	0	22.6333	13	low									TCGA-DD-AACZ-01	1	5.7	20	low									TCGA-MN-A4N5-01	0	2.8	11
							TCGA-GM-A2DD-01	0	76.0667	1	low									TCGA-CQ-A4C6-01	0	45.1	13	low									TCGA-DD-AADB-01	0	41.4	20	low									TCGA-MP-A4T9-01	1	42.1667	11
							TCGA-GM-A2DH-01	0	73.1	1	low									TCGA-CR-6474-01	1	18.8	13	low									TCGA-DD-AADY-01	0	18.5	20	low									TCGA-05-4405-01	0	20.3333	12
							TCGA-GM-A3XN-01	0	67.3	1	low									TCGA-CR-7364-01	0	47.8333	13	low									TCGA-ED-A459-01	0	30.3333	20	low									TCGA-44-6774-01	0	21.9333	12
							TCGA-GM-A4E0-01	0	73.0333	1	low									TCGA-CV-5441-01	0	96.2	13	low									TCGA-G3-A25S-01	1	13.8667	20	low									TCGA-44-7660-01	0	19.7333	12
							TCGA-LD-A7W5-01	0	7.2	1	low									TCGA-CV-7091-01	0	112.7	13	low									TCGA-G3-A25T-01	0	51.7667	20	low									TCGA-44-7669-01	1	19.1333	12
							TCGA-LD-A7W6-01	0	13.4667	1	low									TCGA-CV-7438-01	1	6.46667	13	low									TCGA-RG-A7D4-01	0	36.6	20	low									TCGA-49-4514-01	0	56.6667	12
							TCGA-LL-A440-01	0	25.3	1	low									TCGA-D6-A6EM-01	0	7.73333	13	low									TCGA-WQ-A9G7-01	0	1	20	low									TCGA-49-AAQV-01	1	22.5667	12
							TCGA-LL-A5YL-01	0	17.3	1	low									TCGA-DQ-7592-01	0	38.1	13	low									TCGA-ZP-A9CZ-01	0	23.5333	20	low									TCGA-4B-A93V-01	1	10	12
							TCGA-LL-A5YO-01	0	14.6667	1	low									TCGA-F7-A624-01	0	12.6	13	low									TCGA-2Y-A9GY-01	1	25.2333	21	low									TCGA-50-5935-01	1	21.7667	12
							TCGA-LL-A73Y-01	0	15.9	1	low									TCGA-H7-8501-01	0	15.3667	13	low									TCGA-5R-AA1C-01	0	17.3333	21	low									TCGA-50-5944-01	0	58.3333	12
							TCGA-MS-A51U-01	0	22.7	1	low									TCGA-MZ-A6I9-01	1	16.3	13	low									TCGA-BC-A3KG-01	0	22.6667	21	low									TCGA-55-6543-01	0	14.5	12
							TCGA-OL-A5D7-01	0	59.3333	1	low									TCGA-P3-A6T7-01	1	16.2333	13	low									TCGA-BC-A5W4-01	1	18.2333	21	low									TCGA-55-6978-01	1	5.86667	12
							TCGA-OL-A5RV-01	0	35.4	1	low									TCGA-RS-A6TP-01	0	17.2	13	low									TCGA-CC-A1HT-01	1	3.36667	21	low									TCGA-55-7576-01	0	22.3333	12
							TCGA-OL-A5RX-01	0	29.2667	1	low									TCGA-T2-A6WZ-01	1	16.1333	13	low									TCGA-CC-A3M9-01	1	10	21	low									TCGA-55-7903-01	0	18.9	12
							TCGA-OL-A5RY-01	0	25.0667	1	low									TCGA-BA-5152-01	0	42.9333	14	low									TCGA-CC-A8HS-01	1	10	21	low									TCGA-55-8507-01	0	13.9333	12
							TCGA-OL-A66L-01	0	43.3667	1	low									TCGA-BA-A4IF-01	0	29.8333	14	low									TCGA-DD-A4NN-01	1	29.9667	21	low									TCGA-55-A492-01	0	19.8667	12
							TCGA-OL-A66N-01	0	26.4	1	low									TCGA-CN-6989-01	1	32.6667	14	low									TCGA-DD-AACQ-01	1	14.4	21	low									TCGA-62-8402-01	1	49.9333	12
							TCGA-OL-A6VQ-01	0	20	1	low									TCGA-CN-6995-01	1	3.73333	14	low									TCGA-DD-AADL-01	0	21.2	21	low									TCGA-62-A46P-01	1	19.8	12
							TCGA-OL-A97C-01	0	9.03333	1	low									TCGA-CN-A6V7-01	0	19.8	14	low									TCGA-DD-AAE0-01	0	18.5	21	low									TCGA-64-1677-01	1	20.9333	12
							TCGA-PE-A5DD-01	0	65.1	1	low									TCGA-CR-6473-01	0	37.5	14	low									TCGA-ED-A82E-01	0	13.6	21	low									TCGA-64-1678-01	0	39.6333	12
							TCGA-PL-A8LY-01	0	0.266667	1	low									TCGA-CR-7380-01	1	20.2	14	low									TCGA-ED-A8O6-01	1	1.86667	21	low									TCGA-69-7980-01	0	13.7	12
							TCGA-S3-AA10-01	0	19.5333	1	low									TCGA-CR-7383-01	1	17.3667	14	low									TCGA-FV-A2QR-01	1	19.3667	21	low									TCGA-78-7153-01	0	121.167	12
							TCGA-WT-AB44-01	0	29.4333	1	low									TCGA-CV-7090-01	0	175.067	14	low									TCGA-K7-AAU7-01	0	11.9667	21	low									TCGA-86-8278-01	0	31.4667	12
							TCGA-XX-A89A-01	0	16.2667	1	low									TCGA-CV-7415-01	1	23.1667	14	low									TCGA-QA-A7B7-01	0	3.13333	21	low									TCGA-97-7938-01	1	0.6	12
							TCGA-Z7-A8R5-01	0	109.567	1	low									TCGA-CV-7435-01	1	156	14	low									TCGA-YA-A8S7-01	1	13.7333	21	low									TCGA-97-8547-01	0	21.9	12
							TCGA-3C-AAAU-01	0	134.9	2	low									TCGA-D6-6517-01	0	9.73333	14	low									TCGA-BC-A10U-01	1	27.9	22	low									TCGA-05-4418-01	1	9.13333	13
							TCGA-3C-AALI-01	0	133.5	2	low									TCGA-DQ-5630-01	0	34.3333	14	low									TCGA-CC-A3MC-01	0	12.1	22	low									TCGA-05-4427-01	0	26.3667	13
							TCGA-3C-AALJ-01	0	49.1333	2	low									TCGA-HD-A6I0-01	0	7	14	low									TCGA-CC-A7II-01	0	13.3	22	low									TCGA-05-4430-01	0	25.3667	13
							TCGA-A1-A0SB-01	0	8.63333	2	low									TCGA-IQ-A61E-01	0	38.2333	14	low									TCGA-DD-A73E-01	0	1.46667	22	low									TCGA-38-4625-01	0	99.1	13
							TCGA-A1-A0SG-01	0	14.4667	2	low									TCGA-UF-A71D-01	0	48.7	14	low									TCGA-DD-AACA-02	0	76.7	22	low									TCGA-38-4629-01	1	28.8	13
							TCGA-A1-A0SK-01	1	32.2333	2	low									TCGA-UF-A7JT-01	1	33.1	14	low									TCGA-DD-AACA-01	0	76.7	22	low									TCGA-44-5644-01	0	28.7667	13
							TCGA-A1-A0SP-01	0	19.4667	2	low									TCGA-BA-6868-01	1	15.7333	15	low									TCGA-DD-AADW-01	0	19.5667	22	low									TCGA-49-4486-01	1	77.2667	13
							TCGA-A2-A0CP-01	0	93.7667	2	low									TCGA-BA-A6DJ-01	1	13.5667	15	low									TCGA-DD-AAE6-01	0	4.7	22	low									TCGA-50-5066-02	0	48.0667	13
							TCGA-A2-A0CV-01	0	100.367	2	low									TCGA-BB-7872-01	0	38.9333	15	low									TCGA-DD-AAE9-01	0	24.0667	22	low									TCGA-50-6592-01	1	25.9	13
							TCGA-A2-A0YH-01	0	21.9667	2	low									TCGA-BB-A5HU-01	0	26.0667	15	low									TCGA-DD-AAEE-01	0	27	22	low									TCGA-55-8204-01	0	17.1667	13
							TCGA-A2-A1FV-01	0	23.8	2	low									TCGA-CN-5367-01	1	11.7333	15	low									TCGA-DD-AAVU-01	0	73.4	22	low									TCGA-55-8205-01	0	19.9667	13
							TCGA-A2-A1FW-01	0	17.6	2	low									TCGA-CN-6011-01	0	31.1	15	low									TCGA-DD-AAW3-01	0	54.4333	22	low									TCGA-62-A470-01	1	39.8	13
							TCGA-A2-A1G4-01	0	19.8333	2	low									TCGA-CN-6997-01	1	32.9333	15	low									TCGA-G3-A7M6-01	0	21.0667	22	low									TCGA-67-6215-01	0	5.8	13
							TCGA-A2-A25C-01	0	17.4333	2	low									TCGA-CQ-5324-01	0	53.1	15	low									TCGA-LG-A6GG-01	0	12.9	22	low									TCGA-69-7763-01	0	23	13
							TCGA-A2-A25D-01	0	18.4	2	low									TCGA-CQ-5329-01	0	71.4333	15	low									TCGA-WX-AA44-01	0	20.5	22	low									TCGA-78-7152-01	1	40.5	13
							TCGA-A2-A3KD-01	0	40.2	2	low									TCGA-CQ-6229-01	0	39.3	15	low									TCGA-5C-A9VG-01	0	10.9333	23	low									TCGA-78-7159-01	0	65.8	13
							TCGA-A2-A3XS-01	1	34.4	2	low									TCGA-CR-7370-01	0	3.5	15	low									TCGA-BC-A112-01	1	5.1	23	high									TCGA-78-8655-01	0	78.6667	13
							TCGA-A2-A3XT-01	0	92.3333	2	low									TCGA-CV-5970-01	1	13.5333	15	low									TCGA-CC-5260-01	1	2.9	23	high									TCGA-86-8055-01	1	4.13333	13
							TCGA-A2-A3XX-01	1	47.9667	2	low									TCGA-CV-6936-01	1	5.53333	15	low									TCGA-CC-A3MB-01	1	10.5	23	high									TCGA-91-6840-01	0	12.4	13
							TCGA-A2-A3XY-01	1	36.4333	2	low									TCGA-CV-7099-01	1	8.1	15	low									TCGA-CC-A8HV-01	1	9.3	23	high									TCGA-95-7944-01	0	12.5667	13
							TCGA-A7-A26G-01	0	24.0667	2	low									TCGA-CV-7183-01	0	132.7	15	low									TCGA-CC-A9FW-01	0	8.26667	23	high									TCGA-95-7947-01	0	15.9	13
							TCGA-A7-A3IZ-01	0	10.7333	2	low									TCGA-CV-7250-01	1	96.6667	15	low									TCGA-DD-A4NH-01	0	30.5667	23	high									TCGA-99-8025-01	0	35.3333	13
							TCGA-A7-A3J0-01	0	10.4333	2	low									TCGA-CV-7261-01	0	50.4	15	low									TCGA-DD-AACL-01	1	3.56667	23	high									TCGA-L9-A443-01	1	6.43333	13
							TCGA-A7-A4SB-01	0	13.9333	2	low									TCGA-CV-7263-01	1	18.6667	15	high									TCGA-DD-AACP-01	0	13.8333	23	high									TCGA-MN-A4N4-01	0	39.1667	13
							TCGA-A7-A4SC-01	0	14.8667	2	low									TCGA-CV-7413-01	1	9.8	15	high									TCGA-FV-A3I1-01	1	8.23333	23	high									TCGA-NJ-A7XG-01	0	20.5667	13
							TCGA-A7-A4SD-01	0	14.7	2	low									TCGA-CV-A6JD-01	1	6.06667	15	high									TCGA-FV-A3R2-01	1	6.46667	23	high									TCGA-05-4402-01	1	8.13333	14
							TCGA-A7-A4SF-01	0	18.1667	2	low									TCGA-CV-A6K1-01	0	22.8333	15	high									TCGA-G3-AAV4-01	1	0.9	23	high									TCGA-05-4426-01	0	26.3667	14
							TCGA-A7-A5ZW-01	0	10.8667	2	low									TCGA-CX-7086-01	0	19.1	15	high									TCGA-RC-A6M4-01	0	0.733333	23	high									TCGA-35-5375-01	0	8.8	14
							TCGA-A7-A5ZX-01	0	11.2	2	low									TCGA-D6-8568-01	0	25.3	15	high									TCGA-CC-5264-01	1	3.4	24	high									TCGA-38-4627-01	1	38.2333	14
							TCGA-A8-A06O-01	0	13.2	2	low									TCGA-HD-7831-01	0	22.2333	15	high									TCGA-CC-A7IK-01	1	8.73333	24	high									TCGA-44-2655-01	0	44.1333	14
							TCGA-A8-A07C-01	0	34.4667	2	low									TCGA-IQ-7632-01	0	14.7	15	high									TCGA-CC-A8HU-01	1	11.4667	24	high									TCGA-44-A47B-01	0	9.56667	14
							TCGA-A8-A08R-01	0	1	2	low									TCGA-KU-A66S-01	1	13.5333	15	high									TCGA-DD-AA3A-01	1	13.6667	24	high									TCGA-49-6745-01	0	17.4	14
							TCGA-A8-A08T-01	1	113.633	2	low									TCGA-P3-A6T4-01	1	2.06667	15	high									TCGA-DD-AACX-01	0	5.66667	24	high									TCGA-49-6761-01	0	11.8	14
							TCGA-A8-A09C-01	0	1.03333	2	low									TCGA-P3-A6T8-01	0	13.3333	15	high									TCGA-DD-AAD0-01	0	4.56667	24	high									TCGA-50-5051-01	1	15.9333	14
							TCGA-A8-A0A1-01	0	12.1667	2	low									TCGA-TN-A7HJ-01	0	13.4333	15	high									TCGA-DD-AADD-01	0	41.0333	24	high									TCGA-55-1595-01	0	49.3	14
							TCGA-AC-A2FG-01	0	61.7667	2	low									TCGA-UF-A7J9-01	0	45.2667	15	high									TCGA-ED-A66Y-01	1	9.86667	24	high									TCGA-55-6981-01	1	45.9667	14
							TCGA-AC-A2QI-01	0	19.6	2	low									TCGA-UF-A7JC-01	1	18.2	15	high									TCGA-ED-A7PZ-01	0	0.2	24	high									TCGA-55-7283-01	0	20.3	14
							TCGA-AC-A3BB-01	0	32.9	2	low									TCGA-UP-A6WW-01	0	17.2667	15	high									TCGA-G3-A7M9-01	1	1.86667	24	high									TCGA-55-7914-01	1	6.23333	14
							TCGA-AC-A3HN-01	0	16.5333	2	low									TCGA-BA-6873-01	0	4.06667	16	high									TCGA-G3-AAV1-01	1	11.9667	24	high									TCGA-55-8302-01	0	15.9333	14
							TCGA-AC-A3QP-01	0	22.5	2	low									TCGA-BB-4224-01	0	9.26667	16	high									TCGA-G3-AAV6-01	1	2.16667	24	high									TCGA-55-8614-01	0	17.8667	14
							TCGA-AC-A3W5-01	0	16.8	2	low									TCGA-C9-A47Z-01	1	6.36667	16	high									TCGA-RC-A6M6-01	0	0.3	24	high									TCGA-64-1680-01	0	37.5333	14
							TCGA-AC-A3W6-01	0	20.0667	2	low									TCGA-CQ-A4CD-01	0	34.0667	16	high									TCGA-UB-A7MC-01	0	16.6667	24	high									TCGA-73-4677-01	1	1.26667	14
							TCGA-AC-A3YI-01	0	23.5667	2	low									TCGA-CV-5978-01	1	7.16667	16	high									TCGA-2Y-A9GS-01	1	24.1333	25	high									TCGA-75-6206-01	0	86.3333	14
							TCGA-AC-A4ZE-01	0	29.6667	2	low									TCGA-CV-6938-01	1	4.8	16	high									TCGA-2Y-A9HA-01	1	1.2	25	high									TCGA-78-7161-01	1	9.7	14
							TCGA-AC-A6IW-01	0	13.7667	2	low									TCGA-CV-7089-01	1	65.7333	16	high									TCGA-BC-A10W-01	1	3.03333	25	high									TCGA-78-7166-01	1	8.6	14
							TCGA-AN-A0AJ-01	0	10.1	2	low									TCGA-CV-A6JM-01	1	6.46667	16	high									TCGA-BC-A10Z-01	1	1.13333	25	high									TCGA-78-8660-01	1	10.7	14
							TCGA-AN-A0AR-01	0	0.333333	2	low									TCGA-CV-A6JO-01	1	6.56667	16	high									TCGA-CC-5263-01	1	4.3	25	high									TCGA-80-5611-01	0	86.5	14
							TCGA-AN-A0FD-01	0	6.53333	2	low									TCGA-D6-8569-01	0	25.6667	16	high									TCGA-CC-A5UD-01	1	10.1333	25	high									TCGA-86-7953-01	0	33.2333	14
							TCGA-AN-A0XU-01	0	0.333333	2	low									TCGA-F7-8298-01	0	33.1667	16	high									TCGA-CC-A5UE-01	1	9.06667	25	high									TCGA-86-8358-01	0	21.7667	14
							TCGA-AN-A0XW-01	0	5.66667	2	low									TCGA-HD-7753-01	0	28.8667	16	high									TCGA-CC-A7IG-01	1	9.96667	25	high									TCGA-86-8359-01	1	14.8	14
							TCGA-AO-A03M-01	0	62.2	2	low									TCGA-HD-7754-01	0	26.1	16	high									TCGA-CC-A8HT-01	1	4.66667	25	high									TCGA-91-8499-01	0	1.2	14
							TCGA-AO-A03N-01	0	67.7	2	low									TCGA-QK-A6IG-01	1	7.4	16	high									TCGA-DD-A1EE-01	1	11.6333	25	high									TCGA-L9-A7SV-01	0	18.8333	14
							TCGA-AO-A0JG-01	0	26.6	2	low									TCGA-UF-A7JA-01	0	75.5	16	high									TCGA-DD-A1EJ-01	1	33.5	25	high									TCGA-MP-A4T7-01	1	5.56667	14
							TCGA-AO-A0JL-01	0	56.1	2	low									TCGA-UF-A7JD-01	1	24.6333	16	high									TCGA-DD-A1EL-01	1	13.8333	25	high									TCGA-NJ-A4YF-01	0	72.0333	14
							TCGA-AO-A128-01	0	108.267	2	low									TCGA-UF-A7JF-01	0	56.2	16	high									TCGA-DD-A39Y-01	1	5.7	25	high									TCGA-35-3615-01	0	0.466667	15
							TCGA-AO-A129-01	0	109.533	2	low									TCGA-CN-4742-01	1	13.2333	17	high									TCGA-DD-A4NQ-01	1	12.4333	25	high									TCGA-38-4631-01	1	11.8	15
							TCGA-AO-A12A-01	0	103.733	2	low									TCGA-CN-5363-01	1	8.43333	17	high									TCGA-DD-AAC8-01	1	0.533333	25	high									TCGA-44-6776-01	0	87.2	15
							TCGA-AO-A12C-01	0	79.0667	2	low									TCGA-CN-5365-01	1	11.7	17	high									TCGA-DD-AACH-01	1	6.5	25	high									TCGA-44-6779-01	1	16.6667	15
							TCGA-AO-A1KP-01	0	98.4333	2	low									TCGA-CN-6020-01	1	6.83333	17	high									TCGA-DD-AACK-01	0	0.3	25	high									TCGA-44-7661-01	1	18.5667	15
							TCGA-AR-A0TQ-01	0	99.7	2	low									TCGA-CN-6992-01	0	35.5333	17	high									TCGA-DD-AAD5-01	0	44.8333	25	high									TCGA-44-8119-01	0	9.5	15
							TCGA-AR-A0U2-01	1	85.0333	2	low									TCGA-CN-A49B-01	0	30.1333	17	high									TCGA-DD-AADC-01	1	14.1667	25	high									TCGA-49-4490-01	1	12.8333	15
							TCGA-AR-A1AK-01	0	105.3	2	low									TCGA-CQ-A4CH-01	1	12.6333	17	high									TCGA-G3-AAV5-01	0	11.8	25	high									TCGA-50-6673-01	1	0.733333	15
							TCGA-AR-A1AR-01	1	17.4667	2	low									TCGA-CV-5435-01	1	77.3	17	high									TCGA-G3-AAV7-01	0	12.0333	25	high									TCGA-55-6972-01	1	54.4	15
							TCGA-AR-A1AU-01	0	95.6	2	low									TCGA-CV-5440-01	0	109	17	high									TCGA-MI-A75I-01	0	21	25	high									TCGA-55-6984-01	1	25.3333	15
							TCGA-AR-A24K-01	0	51.6	2	low									TCGA-CV-6945-01	1	12.2	17	high									TCGA-ZP-A9D2-01	1	25.5	25	high									TCGA-55-8087-01	0	15.4	15
							TCGA-AR-A24P-01	0	2.8	2	low									TCGA-CV-6961-01	1	2.53333	17	high																						TCGA-55-8094-01	0	18.0333	15
							TCGA-AR-A24Q-01	0	105.733	2	low									TCGA-CV-7100-01	1	9.13333	17	high																						TCGA-55-A490-01	1	3.3	15
							TCGA-AR-A24W-01	0	51.6667	2	low									TCGA-CV-7180-01	1	10.9	17	high																						TCGA-62-8395-01	0	40.5333	15
							TCGA-AR-A24X-01	0	100.133	2	low									TCGA-CV-7409-01	1	18.1	17	high																						TCGA-62-8399-01	0	89.8667	15
							TCGA-AR-A2LQ-01	0	41.1	2	low									TCGA-CV-7422-01	1	34.5667	17	high																						TCGA-73-4666-01	0	26.6667	15
							TCGA-AR-A2LR-01	0	58.0667	2	low									TCGA-CV-7440-01	1	22.5	17	high																						TCGA-78-7158-01	1	5.96667	15
							TCGA-AR-A5QM-01	0	74.3667	2	low									TCGA-CV-A6K2-01	1	10.5667	17	high																						TCGA-78-7536-01	1	8.13333	15
							TCGA-B6-A0IE-01	1	66.4333	2	low									TCGA-D6-A6ES-01	0	12.9667	17	high																						TCGA-91-6831-01	0	10.3333	15
							TCGA-B6-A0IJ-01	0	236.867	2	low									TCGA-DQ-7595-01	0	39.6667	17	high																						TCGA-91-6848-01	0	7.46667	15
							TCGA-B6-A0IN-01	1	85.7667	2	low									TCGA-HD-A4C1-01	0	0.366667	17	high																						TCGA-97-8179-01	0	14.5	15
							TCGA-B6-A0IP-01	1	130.867	2	low									TCGA-HD-A634-01	1	4.33333	17	high																						TCGA-MN-A4N1-01	0	27.5667	15
							TCGA-B6-A0RL-01	1	82.3	2	low									TCGA-IQ-A6SH-01	0	15.7	17	high																						TCGA-MP-A4TE-01	1	29.8667	15
							TCGA-B6-A0RQ-01	1	142.233	2	low									TCGA-P3-A6T6-01	1	13.1667	17	high																						TCGA-MP-A5C7-01	0	74.9333	15
							TCGA-B6-A0WT-01	0	191.3	2	low									TCGA-BA-A6D8-01	0	28.3333	18	high																						TCGA-NJ-A4YI-01	1	0.133333	15
							TCGA-B6-A0X7-01	1	59.3667	2	low									TCGA-BA-A8YP-01	0	16.6333	18	high																						TCGA-44-7662-01	0	7.26667	16
							TCGA-B6-A402-01	0	76.0333	2	low									TCGA-BB-7862-01	0	37.2333	18	high																						TCGA-44-7670-01	0	29.4	16
							TCGA-BH-A0B0-01	0	82.5667	2	low									TCGA-BB-7870-01	0	67.2	18	high																						TCGA-49-6742-01	1	16.2667	16
							TCGA-BH-A0B8-01	0	52.3	2	low									TCGA-BB-A5HZ-01	0	27.5667	18	high																						TCGA-55-5899-01	0	31	16
							TCGA-BH-A0BG-01	0	62.3667	2	low									TCGA-CN-5361-01	1	70.6667	18	high																						TCGA-55-7726-01	0	21.7333	16
							TCGA-BH-A0BL-01	0	75.9333	2	low									TCGA-CN-6024-01	1	11.2333	18	high																						TCGA-62-8394-01	1	4.63333	16
							TCGA-BH-A0BT-01	0	78.8333	2	low									TCGA-CN-A63W-01	1	12.5667	18	high																						TCGA-69-8253-01	0	14.2	16
							TCGA-BH-A0C3-01	0	90.3	2	low									TCGA-CQ-6219-01	1	15.9667	18	high																						TCGA-73-4675-01	1	30.7333	16
							TCGA-BH-A0DE-01	0	79.0667	2	low									TCGA-CQ-6221-01	0	33.3333	18	high																						TCGA-78-7156-01	1	32.5333	16
							TCGA-BH-A0DL-01	0	79.3667	2	low									TCGA-CQ-6224-01	0	57.3667	18	high																						TCGA-78-7163-01	0	241.6	16
							TCGA-BH-A0E6-01	0	9.76667	2	low									TCGA-CQ-6225-01	1	13.4333	18	high																						TCGA-78-7167-01	1	89.3667	16
							TCGA-BH-A0EA-01	1	33.0333	2	low									TCGA-CQ-7067-01	0	16.9667	18	high																						TCGA-78-7633-01	1	50.9333	16
							TCGA-BH-A0EE-01	0	31.4333	2	low									TCGA-CQ-A4CB-01	0	29.7667	18	high																						TCGA-78-8640-01	0	235.4	16
							TCGA-BH-A0EI-01	0	64.2	2	low									TCGA-CQ-A4CI-01	0	31.6667	18	high																						TCGA-78-8662-01	1	112.033	16
							TCGA-BH-A0H0-01	0	15.3667	2	low									TCGA-CR-7365-01	0	39.7	18	high																						TCGA-86-7711-01	1	34.8667	16
							TCGA-BH-A0HB-01	0	26.8667	2	low									TCGA-CV-5973-01	0	88.0333	18	high																						TCGA-86-8073-01	0	24.6667	16
							TCGA-BH-A0HN-01	0	17.2	2	low									TCGA-CV-6937-01	1	20.8	18	high																						TCGA-86-A4D0-01	1	3.86667	16
							TCGA-BH-A0RX-01	0	5.66667	2	low									TCGA-CV-6950-01	1	15.3	18	high																						TCGA-86-A4JF-01	1	24.5667	16
							TCGA-BH-A18F-01	0	33.3667	2	low									TCGA-CV-7097-01	1	12.8333	18	high																						TCGA-97-A4M3-01	0	18	16
							TCGA-BH-A18R-01	1	38.0667	2	low									TCGA-CV-7245-01	0	26.5667	18	high																						TCGA-J2-8194-01	0	24.1333	16
							TCGA-BH-A1EY-01	1	17.9333	2	low									TCGA-CV-7406-01	1	58.2667	18	high																						TCGA-05-4420-01	0	30.4	17
							TCGA-BH-A1F5-01	1	90.4	2	low									TCGA-CV-7414-01	1	0.466667	18	high																						TCGA-38-4628-01	1	49.7333	17
							TCGA-BH-A1F6-01	1	98.8333	2	low									TCGA-CV-A465-01	1	7.16667	18	high																						TCGA-38-6178-01	0	14.9333	17
							TCGA-BH-A1FH-01	1	34.4667	2	low									TCGA-D6-6823-01	0	23.3667	18	high																						TCGA-49-4488-01	1	28.9667	17
							TCGA-BH-A1FL-01	1	55.7667	2	low									TCGA-HD-7917-01	1	27.8667	18	high																						TCGA-49-4494-01	1	36.0333	17
							TCGA-BH-A28Q-01	0	37.3	2	low									TCGA-IQ-7630-01	0	16.1667	18	high																						TCGA-49-6743-01	0	54.0333	17
							TCGA-C8-A12M-01	0	11.9333	2	low									TCGA-P3-A6SX-01	1	47.6667	18	high																						TCGA-50-5946-02	0	53.9	17
							TCGA-C8-A1HJ-01	0	0.166667	2	low									TCGA-RS-A6TO-01	1	12.9	18	high																						TCGA-50-5946-01	0	53.9	17
							TCGA-C8-A8HR-01	0	13.6	2	low									TCGA-UF-A719-01	0	55.4333	18	high																						TCGA-50-6593-01	1	11.2	17
							TCGA-D8-A1JG-01	0	53.7333	2	low									TCGA-UF-A7JV-01	1	3	18	high																						TCGA-50-7109-01	1	10.2667	17
							TCGA-D8-A1JH-01	0	14.2	2	low									TCGA-BA-7269-01	0	42.4333	19	high																						TCGA-55-1594-01	0	39.2667	17
							TCGA-D8-A1JN-01	0	20.6667	2	low									TCGA-BB-7863-01	0	34.1667	19	high																						TCGA-55-8506-01	0	0.366667	17
							TCGA-D8-A73X-01	0	25.5667	2	low									TCGA-CN-4730-01	0	27.2333	19	high																						TCGA-55-A494-01	0	16.0333	17
							TCGA-E2-A10F-01	0	29.2667	2	low									TCGA-CN-4731-01	1	33.2667	19	high																						TCGA-73-4659-01	1	23.7	17
							TCGA-E2-A14N-01	0	47.8	2	low									TCGA-CN-6988-01	0	10.6	19	high																						TCGA-73-4676-01	1	9.36667	17
							TCGA-E2-A154-01	0	19.7	2	low									TCGA-CQ-5326-01	1	2.96667	19	high																						TCGA-86-8074-01	0	0.8	17
							TCGA-E2-A159-01	0	25.4	2	low									TCGA-CQ-5332-01	1	10.5667	19	high																						TCGA-95-7043-01	1	16.7667	17
							TCGA-E2-A15A-06	0	23.6667	2	low									TCGA-CQ-6220-01	1	32.8333	19	high																						TCGA-95-8494-01	0	2.8	17
							TCGA-E2-A15J-01	0	54.6667	2	low									TCGA-CQ-7069-01	0	42.4667	19	high																						TCGA-97-8176-01	1	15.6	17
							TCGA-E2-A15O-01	0	51.5	2	low									TCGA-CQ-A4CG-01	1	14.3333	19	high																						TCGA-05-4397-01	1	24.3667	18
							TCGA-E2-A15P-01	0	19.8333	2	low									TCGA-CR-7379-01	0	34.5333	19	high																						TCGA-05-5715-01	0	2.06667	18
							TCGA-E2-A1BD-01	0	37.7667	2	low									TCGA-CV-7416-01	1	25.4333	19	high																						TCGA-38-4630-01	1	35.7667	18
							TCGA-E2-A1II-01	0	34.1667	2	low									TCGA-CV-A6JU-01	0	3.66667	19	high																						TCGA-44-7671-01	0	29.6333	18
							TCGA-E2-A1L6-01	0	54.9333	2	low									TCGA-D6-A6EO-01	0	25.3	19	high																						TCGA-44-8120-01	0	8.66667	18
							TCGA-E2-A1L8-01	0	74.6667	2	low									TCGA-IQ-A61H-01	0	37.9333	19	high																						TCGA-50-5044-01	1	20.8	18
							TCGA-E2-A1LA-01	0	24.9333	2	low									TCGA-IQ-A61O-01	1	14.0333	19	high																						TCGA-50-5933-01	1	79.7667	18
							TCGA-E2-A1LS-01	0	53.4667	2	low									TCGA-QK-A8Z8-01	1	5.7	19	high																						TCGA-50-5936-01	1	8.56667	18
							TCGA-E2-A576-01	0	34.7667	2	low									TCGA-QK-A8ZA-01	1	12.3667	19	high																						TCGA-55-1596-01	0	68.8333	18
							TCGA-E9-A1N8-01	0	34.6333	2	low									TCGA-WA-A7GZ-01	1	20.8333	19	high																						TCGA-55-8505-01	0	14.6667	18
							TCGA-E9-A1N9-01	0	36.7	2	low									TCGA-BB-A5HY-01	1	10.7	20	high																						TCGA-62-A46O-01	1	48.4667	18
							TCGA-E9-A1R2-01	0	35.4333	2	low									TCGA-CN-4725-01	0	38.5667	20	high																						TCGA-64-1679-01	0	82.9333	18
							TCGA-E9-A1R4-01	0	6.2	2	low									TCGA-CN-4727-01	0	52	20	high																						TCGA-64-5781-01	0	51.9667	18
							TCGA-E9-A1RF-01	0	6.66667	2	low									TCGA-CQ-6228-01	1	15.2	20	high																						TCGA-69-7760-01	0	6.73333	18
							TCGA-E9-A1RI-01	0	48.3	2	low									TCGA-CQ-A4C7-01	1	11.7667	20	high																						TCGA-69-7973-01	0	7.66667	18
							TCGA-E9-A229-01	0	38.2667	2	low									TCGA-CQ-A4C9-01	0	23.5667	20	high																						TCGA-71-6725-01	0	8.53333	18
							TCGA-E9-A22D-01	0	41.6	2	low									TCGA-CR-7390-01	0	50.2667	20	high																						TCGA-73-A9RS-01	1	11.3333	18
							TCGA-E9-A3QA-01	0	30.6	2	low									TCGA-CV-5432-01	0	131	20	high																						TCGA-75-6214-01	1	37.1667	18
							TCGA-EW-A1IW-01	0	12.3667	2	low									TCGA-CV-5436-01	1	19.4667	20	high																						TCGA-78-7148-01	1	20.8667	18
							TCGA-EW-A1IX-01	0	40.2667	2	low									TCGA-CV-6441-01	1	9.73333	20	high																						TCGA-78-7537-01	1	54.0667	18
							TCGA-EW-A1J1-01	0	19.1667	2	low									TCGA-CV-6951-01	1	30.5	20	high																						TCGA-86-8054-01	0	38.2667	18
							TCGA-EW-A1J3-01	0	16.8	2	low									TCGA-CV-6956-01	1	7.23333	20	high																						TCGA-95-7948-01	0	15.8667	18
							TCGA-EW-A1P3-01	0	53.7	2	low									TCGA-CV-6960-01	1	28.7333	20	high																						TCGA-97-7937-01	0	18.8	18
							TCGA-EW-A1P6-01	0	18.7333	2	low									TCGA-CV-7243-01	0	31.8	20	high																						TCGA-05-4250-01	1	4.03333	19
							TCGA-EW-A1PH-01	0	20.2333	2	low									TCGA-D6-A4Z9-01	0	17.9667	20	high																						TCGA-05-4415-01	1	3.03333	19
							TCGA-EW-A423-01	0	17.7667	2	low									TCGA-DQ-5631-01	1	18.2667	20	high																						TCGA-05-5429-01	1	9.16667	19
							TCGA-EW-A6SD-01	0	33.6667	2	low									TCGA-DQ-7589-01	0	46.9667	20	high																						TCGA-44-8117-01	0	12.8333	19
							TCGA-GM-A2D9-01	1	60.4	2	low									TCGA-F7-A622-01	1	11.9667	20	high																						TCGA-49-4507-01	1	8.93333	19
							TCGA-GM-A3NW-01	0	112.033	2	low									TCGA-HD-8224-01	1	14.8667	20	high																						TCGA-49-6767-01	0	22.5667	19
							TCGA-HN-A2OB-01	1	63.3333	2	low									TCGA-KU-A66T-01	0	18.4	20	high																						TCGA-50-5072-01	1	8.33333	19
							TCGA-LD-A9QF-01	0	10.7667	2	low									TCGA-MT-A51X-01	0	8.06667	20	high																						TCGA-50-5932-01	1	41.1667	19
							TCGA-LL-A50Y-01	0	25.4	2	low									TCGA-MZ-A7D7-01	0	18.2333	20	high																						TCGA-50-6594-01	1	12.3333	19
							TCGA-LL-A73Z-01	1	7.56667	2	low									TCGA-P3-A6T2-01	0	76.6	20	high																						TCGA-55-7913-01	1	18.7	19
							TCGA-PE-A5DE-01	0	88.1667	2	low									TCGA-QK-A6VB-01	0	21.3667	20	high																						TCGA-55-A48Y-01	0	21	19
							TCGA-S3-A6ZF-01	0	19.0667	2	low									TCGA-UF-A71B-01	0	50.2	20	high																						TCGA-62-A471-01	0	41.5333	19
							TCGA-S3-AA14-01	0	17.6333	2	low									TCGA-UF-A71E-01	1	50.1333	20	high																						TCGA-69-7979-01	0	13.6	19
							TCGA-UL-AAZ6-01	0	17.2667	2	low									TCGA-BA-5149-01	1	26.8667	21	high																						TCGA-71-8520-01	1	7	19
							TCGA-W8-A86G-01	0	11.5667	2	low									TCGA-BB-4227-01	0	4.46667	21	high																						TCGA-73-4668-01	0	15.5667	19
							TCGA-5L-AAT1-01	0	49.0333	3	low									TCGA-BB-8601-01	0	20.8	21	high																						TCGA-73-4670-01	0	4.36667	19
							TCGA-A1-A0SE-01	0	44.0333	3	low									TCGA-CN-4726-01	1	4.73333	21	high																						TCGA-78-7145-01	1	27.5333	19
							TCGA-A2-A04V-01	1	64	3	low									TCGA-CN-5364-01	1	16.4333	21	high																						TCGA-78-7155-01	1	39.0333	19
							TCGA-A2-A0CQ-01	0	89.8333	3	low									TCGA-CN-5366-01	1	12	21	high																						TCGA-86-7955-01	0	35.7333	19
							TCGA-A2-A0CU-01	1	5.26667	3	low									TCGA-CV-5979-01	0	43.8333	21	high																						TCGA-86-8672-01	1	0.633333	19
							TCGA-A2-A0D0-01	0	68.2667	3	low									TCGA-CV-6935-01	1	9.83333	21	high																						TCGA-86-8673-01	0	28.7333	19
							TCGA-A2-A0ET-01	0	35.5333	3	low									TCGA-CV-6954-01	1	66.7333	21	high																						TCGA-91-6836-01	0	13.9	19
							TCGA-A2-A0SU-01	0	55.4	3	low									TCGA-CV-7095-01	1	19.0667	21	high																						TCGA-93-8067-01	0	6.2	19
							TCGA-A2-A0T1-01	0	17.3667	3	low									TCGA-CV-7102-01	1	1.86667	21	high																						TCGA-95-7039-01	0	42.4	19
							TCGA-A2-A0T5-01	0	17.7	3	low									TCGA-CV-7103-01	1	53.0333	21	high																						TCGA-95-7562-01	1	2.9	19
							TCGA-A2-A0YD-01	0	25.6333	3	low									TCGA-CV-7236-01	1	4.8	21	high																						TCGA-95-7567-01	0	18.9333	19
							TCGA-A2-A0YM-01	0	32.1667	3	low									TCGA-CV-7252-01	1	5.03333	21	high																						TCGA-MP-A4T8-01	1	5.36667	19
							TCGA-A2-A1FX-01	0	61.5667	3	low									TCGA-CV-7423-01	1	101.967	21	high																						TCGA-MP-A4TA-01	1	31.6667	19
							TCGA-A2-A3KC-01	0	36.7333	3	low									TCGA-CV-7430-01	1	16.5	21	high																						TCGA-MP-A4TC-01	1	2.46667	19
							TCGA-A2-A4S3-01	0	22.2	3	low									TCGA-CV-7437-01	1	16.8667	21	high																						TCGA-NJ-A4YP-01	0	1.66667	19
							TCGA-A7-A0CH-01	0	35.9667	3	low									TCGA-DQ-5629-01	1	31.3667	21	high																						TCGA-05-4390-01	0	37.5333	20
							TCGA-A7-A3IY-01	0	11.5	3	low									TCGA-DQ-7588-01	1	14.2333	21	high																						TCGA-05-4396-01	1	10.1	20
							TCGA-A7-A6VY-01	0	8.86667	3	low									TCGA-HD-7832-01	0	27.8667	21	high																						TCGA-44-7667-01	0	36.5667	20
							TCGA-A8-A06T-01	0	53.8	3	low									TCGA-HD-A633-01	0	14.0333	21	high																						TCGA-49-AAR9-01	1	8.66667	20
							TCGA-A8-A06U-01	1	29.4333	3	low									TCGA-P3-A5QA-01	0	72.7333	21	high																						TCGA-50-5931-01	1	14.4667	20
							TCGA-A8-A075-01	0	17.2667	3	low									TCGA-P3-A5QF-01	1	11	21	high																						TCGA-50-6591-01	1	3.96667	20
							TCGA-A8-A07B-01	0	43.6	3	low									TCGA-P3-A6T3-01	1	19.2333	21	high																						TCGA-50-6595-01	1	6.3	20
							TCGA-A8-A08L-01	1	10.1333	3	low									TCGA-P3-A6T5-01	1	29.4	21	high																						TCGA-53-7624-01	1	34.7667	20
							TCGA-A8-A09A-01	0	10.1333	3	low									TCGA-T3-A92N-01	1	3.16667	21	high																						TCGA-55-6975-01	1	3.93333	20
							TCGA-A8-A09B-01	0	12.1667	3	low									TCGA-UF-A71A-06	1	2.86667	21	high																						TCGA-55-7570-01	0	27.4667	20
							TCGA-A8-A09M-01	0	33.5333	3	low									TCGA-BA-4074-01	1	15.4	22	high																						TCGA-62-8398-01	1	14.8	20
							TCGA-A8-A0A4-01	0	13.2	3	low									TCGA-BA-4075-01	1	9.43333	22	high																						TCGA-64-5774-01	0	89.2	20
							TCGA-A8-A0AB-01	0	17.2667	3	low									TCGA-BA-4076-01	1	13.8333	22	high																						TCGA-64-5775-01	1	2.06667	20
							TCGA-A8-A0AD-01	0	38.5667	3	low									TCGA-BA-6872-01	1	12.8	22	high																						TCGA-75-7027-01	0	101.967	20
							TCGA-AC-A23G-01	0	74.9333	3	low									TCGA-BA-A6DE-01	0	14.6667	22	high																						TCGA-78-7146-01	1	5.76667	20
							TCGA-AC-A2QJ-01	1	14.8667	3	low									TCGA-BB-7864-01	0	50.9	22	high																						TCGA-78-7147-01	1	19.5333	20
							TCGA-AC-A3TN-01	0	15.2	3	low									TCGA-BB-7871-01	0	25	22	high																						TCGA-78-7150-01	1	22.2	20
							TCGA-AC-A5XS-01	0	19.6	3	low									TCGA-BB-A6UO-01	1	8.93333	22	high																						TCGA-78-7154-01	1	19.7667	20
							TCGA-AC-A6NO-01	0	1.7	3	low									TCGA-CN-6998-01	1	11.9	22	high																						TCGA-78-7220-01	1	26.9	20
							TCGA-AN-A0FY-01	0	0.333333	3	low									TCGA-CQ-6227-01	1	4.3	22	high																						TCGA-78-7542-01	1	10.7	20
							TCGA-AN-A0XT-01	0	0.333333	3	low									TCGA-CQ-7065-01	0	54.2667	22	high																						TCGA-86-6562-01	1	12.5333	20
							TCGA-AO-A03U-01	1	59.7667	3	low									TCGA-CR-5247-01	0	11.9333	22	high																						TCGA-86-7713-01	0	38.5667	20
							TCGA-AO-A03V-01	0	45.0333	3	low									TCGA-CR-6493-01	1	9.4	22	high																						TCGA-86-8279-01	0	31.6333	20
							TCGA-AO-A0J6-01	0	38	3	low									TCGA-CV-5966-01	1	18.1667	22	high																						TCGA-86-8674-01	0	26.8667	20
							TCGA-AO-A0J7-01	0	20.6	3	low									TCGA-CV-5976-01	0	49.2667	22	high																						TCGA-91-6829-01	1	41.9333	20
							TCGA-AO-A0J8-01	0	22.6667	3	low									TCGA-CV-5977-01	0	61.3333	22	high																						TCGA-91-6847-01	0	28.0667	20
							TCGA-AO-A124-01	0	116.867	3	low									TCGA-CV-6003-01	0	55.5	22	high																						TCGA-99-8033-01	1	21.8667	20
							TCGA-AR-A0TP-01	0	142.5	3	low									TCGA-CV-6940-01	1	26.8	22	high																						TCGA-J2-A4AD-01	1	18.3333	20
							TCGA-AR-A0TR-01	1	5.33333	3	low									TCGA-CV-6962-01	1	4.2	22	high																						TCGA-L9-A5IP-01	1	1.93333	20
							TCGA-AR-A0TV-01	0	76.2667	3	low									TCGA-CV-7177-01	1	22.1	22	high																						TCGA-MP-A4SY-01	1	50.0333	20
							TCGA-AR-A1AO-01	0	87.2667	3	low									TCGA-CV-7247-01	1	19.2333	22	high																						TCGA-MP-A4TF-01	1	11.2	20
							TCGA-AR-A1AT-01	1	42.4	3	low									TCGA-CV-7253-01	1	12.0333	22	high
							TCGA-AR-A24N-01	0	101.167	3	low									TCGA-CV-7255-01	1	2.13333	22	high
							TCGA-AR-A251-01	0	101	3	low									TCGA-CV-7421-01	1	0.0666667	22	high
							TCGA-AR-A255-01	0	72.0333	3	low									TCGA-CV-7429-01	1	3.56667	22	high
							TCGA-AR-A2LH-01	1	20.5333	3	low									TCGA-CV-7432-01	1	85.6667	22	high
							TCGA-AR-A2LL-01	0	67.0667	3	low									TCGA-CV-7434-01	1	7.26667	22	high
							TCGA-AR-A5QP-01	0	39.5	3	low									TCGA-CX-7082-01	1	0.366667	22	high
							TCGA-B6-A0IO-01	0	168.067	3	low									TCGA-F7-A61W-01	0	0.466667	22	high
							TCGA-B6-A0X0-01	1	131.5	3	low									TCGA-H7-8502-01	0	15.2667	22	high
							TCGA-B6-A0X4-01	1	28.6667	3	low									TCGA-IQ-A61G-01	0	12	22	high
							TCGA-B6-A2IU-01	0	172.533	3	low									TCGA-IQ-A6SG-01	0	19.3	22	high
							TCGA-B6-A40C-01	0	72.1333	3	low									TCGA-P3-A5Q6-01	1	16	22	high
							TCGA-BH-A0AU-01	0	63.8	3	low									TCGA-P3-A6T0-01	0	19.2667	22	high
							TCGA-BH-A0B3-01	0	40.1	3	low									TCGA-QK-A64Z-01	1	21.3667	22	high
							TCGA-BH-A0B6-01	0	82.7667	3	low									TCGA-QK-A6IH-01	0	21.7667	22	high
							TCGA-BH-A0BO-01	0	73.2333	3	low									TCGA-UF-A71A-01	1	2.86667	22	high
							TCGA-BH-A0BQ-01	0	75.1667	3	low									TCGA-UF-A7JK-01	1	14.1333	22	high
							TCGA-BH-A0BW-01	0	79.0333	3	low
							TCGA-BH-A0DD-01	0	82.8667	3	low
							TCGA-BH-A0DG-01	0	68.0333	3	low
							TCGA-BH-A0DX-01	0	71.8667	3	low
							TCGA-BH-A0E0-01	0	4.46667	3	low
							TCGA-BH-A0E2-01	0	14.5	3	low
							TCGA-BH-A0GY-01	0	30.7667	3	low
							TCGA-BH-A0H3-01	0	64.2667	3	low
							TCGA-BH-A0HA-01	0	53.7	3	low
							TCGA-BH-A0HL-01	0	2.4	3	low
							TCGA-BH-A0HW-01	0	52.0333	3	low
							TCGA-BH-A1EO-01	1	93.2667	3	low
							TCGA-BH-A1ES-01	1	115.4	3	low
							TCGA-BH-A1EV-01	1	12.1667	3	low
							TCGA-BH-A1FG-01	1	124.533	3	low
							TCGA-BH-A1FU-01	1	56.2667	3	low
							TCGA-BH-A202-01	0	26.5	3	low
							TCGA-BH-A203-01	1	39.1333	3	low
							TCGA-C8-A130-01	0	12.3333	3	low
							TCGA-C8-A135-01	0	13.1	3	low
							TCGA-C8-A1HG-01	0	11.5	3	low
							TCGA-C8-A1HK-01	0	12.2	3	low
							TCGA-C8-A275-01	0	0.0333333	3	low
							TCGA-C8-A278-01	0	9.9	3	low
							TCGA-C8-A27B-01	0	14.6333	3	low
							TCGA-D8-A13Y-01	0	57.6	3	low
							TCGA-D8-A1J8-01	0	14.3667	3	low
							TCGA-D8-A1JF-01	0	12.2	3	low
							TCGA-D8-A1JU-01	0	14.9	3	low
							TCGA-D8-A1X8-01	0	26.1	3	low
							TCGA-D8-A1XA-01	0	27.9667	3	low
							TCGA-D8-A1XB-01	0	18.4	3	low
							TCGA-D8-A1XD-01	0	17.4	3	low
							TCGA-D8-A1XF-01	0	15.4333	3	low
							TCGA-D8-A1XV-01	0	15.3667	3	low
							TCGA-D8-A1Y2-01	0	14.4333	3	low
							TCGA-D8-A27V-01	0	12.7	3	low
							TCGA-D8-A3Z5-01	0	33.8333	3	low
							TCGA-E2-A10E-01	0	28.8333	3	low
							TCGA-E2-A14P-01	0	41.5333	3	low
							TCGA-E2-A14Q-01	0	38.7667	3	low
							TCGA-E2-A14S-01	0	33.6333	3	low
							TCGA-E2-A155-01	0	21.3333	3	low
							TCGA-E2-A15D-01	0	17.5333	3	low
							TCGA-E2-A15F-01	0	21.9333	3	low
							TCGA-E2-A15G-01	0	18.4667	3	low
							TCGA-E2-A15K-01	0	9.16667	3	low
							TCGA-E2-A15S-01	0	14.2667	3	low
							TCGA-E2-A1B4-01	1	33.4667	3	low
							TCGA-E2-A573-01	0	35.4	3	low
							TCGA-E9-A1N3-01	0	35.3	3	low
							TCGA-E9-A1N4-01	0	33.3333	3	low
							TCGA-E9-A1ND-01	0	42.2	3	low
							TCGA-E9-A1RC-01	0	40.8	3	low
							TCGA-E9-A227-01	0	32.5	3	low
							TCGA-E9-A22G-01	0	41.3	3	low
							TCGA-E9-A245-01	0	0.866667	3	low
							TCGA-E9-A249-01	0	7.23333	3	low
							TCGA-E9-A2JS-01	1	30.1333	3	low
							TCGA-EW-A1J2-01	0	13.4333	3	low
							TCGA-EW-A1OZ-01	0	40.9667	3	low
							TCGA-EW-A1PB-01	0	20.2667	3	low
							TCGA-EW-A1PE-01	0	10.6667	3	low
							TCGA-EW-A1PG-01	0	35.0333	3	low
							TCGA-EW-A424-01	0	23.8333	3	low
							TCGA-EW-A6SC-01	0	31.7333	3	low
							TCGA-GI-A2C8-01	0	7.5	3	low
							TCGA-GM-A3XG-01	0	44.3333	3	low
							TCGA-GM-A3XL-01	0	70.2667	3	low
							TCGA-GM-A5PV-01	0	13.7333	3	low
							TCGA-LD-A74U-01	0	13.4	3	low
							TCGA-LL-A7T0-01	0	12.5333	3	low
							TCGA-LL-A9Q3-01	0	17.7333	3	low
							TCGA-OL-A5S0-01	0	20.6667	3	low
							TCGA-OL-A66O-01	0	17.6	3	low
							TCGA-PE-A5DC-01	1	47.6667	3	low
							TCGA-S3-AA0Z-01	0	20.9667	3	low
							TCGA-S3-AA12-01	0	19.1333	3	low
							TCGA-V7-A7HQ-01	0	67.7667	3	low
							TCGA-A1-A0SI-01	0	21.1667	4	low
							TCGA-A1-A0SO-01	0	28.4	4	low
							TCGA-A2-A0CM-01	1	25.1333	4	low
							TCGA-A2-A0CW-01	0	109.433	4	low
							TCGA-A2-A0D1-01	0	35.0333	4	low
							TCGA-A2-A0D2-01	0	34.2333	4	low
							TCGA-A2-A0EV-01	0	32.2667	4	low
							TCGA-A2-A0T3-01	0	50.5333	4	low
							TCGA-A2-A0T4-01	0	20.8	4	low
							TCGA-A2-A0YJ-01	0	18.8667	4	low
							TCGA-A2-A1G1-01	0	19.4667	4	low
							TCGA-A2-A25B-01	0	43.0333	4	low
							TCGA-A2-A3XV-01	0	33.2	4	low
							TCGA-A7-A0DA-01	0	36.1667	4	low
							TCGA-A7-A425-01	0	14.9	4	low
							TCGA-A7-A56D-01	0	14.9333	4	low
							TCGA-A7-A6VV-01	0	10.4333	4	low
							TCGA-A8-A06Q-01	0	1.03333	4	low
							TCGA-A8-A079-01	0	9.13333	4	low
							TCGA-A8-A07F-01	0	19.2333	4	low
							TCGA-A8-A07G-01	0	19.2333	4	low
							TCGA-A8-A07R-01	0	9.1	4	low
							TCGA-A8-A084-01	0	15.2667	4	low
							TCGA-A8-A086-01	0	13.2	4	low
							TCGA-A8-A08C-01	0	29.3667	4	low
							TCGA-A8-A08F-01	0	33.4667	4	low
							TCGA-A8-A08G-01	0	20.2333	4	low
							TCGA-A8-A08S-01	0	33.4667	4	low
							TCGA-A8-A097-01	0	12.1667	4	low
							TCGA-A8-A09D-01	0	50.7333	4	low
							TCGA-A8-A09I-01	0	45.7	4	low
							TCGA-A8-A09N-01	0	1.03333	4	low
							TCGA-AC-A2B8-01	0	22.5667	4	low
							TCGA-AC-A2BK-01	0	74.0667	4	low
							TCGA-AC-A2FE-01	1	87.8667	4	low
							TCGA-AC-A2FM-01	1	26.4	4	low
							TCGA-AC-A5XU-01	0	15.1667	4	low
							TCGA-AC-A6IX-01	0	12.4333	4	low
							TCGA-AN-A0AM-01	0	0.166667	4	low
							TCGA-AN-A0AT-01	0	0.333333	4	low
							TCGA-AN-A0FF-01	0	5.73333	4	low
							TCGA-AN-A0FS-01	0	7	4	low
							TCGA-AN-A0FT-01	0	7.13333	4	low
							TCGA-AN-A0FW-01	0	0.366667	4	low
							TCGA-AN-A0FX-01	0	0.333333	4	low
							TCGA-AN-A0XN-01	0	0.333333	4	low
							TCGA-AN-A0XO-01	0	12.5	4	low
							TCGA-AO-A03O-01	1	82.7667	4	low
							TCGA-AO-A03P-01	1	97.0333	4	low
							TCGA-AO-A0JD-01	0	73	4	low
							TCGA-AO-A0JE-01	0	77.8333	4	low
							TCGA-AO-A0JF-01	0	66	4	low
							TCGA-AO-A12E-01	0	71.4	4	low
							TCGA-AO-A12G-01	0	54.6333	4	low
							TCGA-AR-A0TU-01	0	23.6333	4	low
							TCGA-AR-A0TW-01	0	100.3	4	low
							TCGA-AR-A0U0-01	0	66.2667	4	low
							TCGA-AR-A0U4-01	0	108.7	4	low
							TCGA-AR-A1AH-01	0	126.9	4	low
							TCGA-AR-A1AP-01	0	95.2	4	low
							TCGA-AR-A24H-01	0	163.133	4	low
							TCGA-AR-A24R-01	0	114.333	4	low
							TCGA-AR-A24V-01	0	106.767	4	low
							TCGA-AR-A24Z-01	0	100.033	4	low
							TCGA-AR-A250-01	0	90.2333	4	low
							TCGA-AR-A5QN-01	0	33.7667	4	low
							TCGA-AR-A5QQ-01	1	10.7333	4	low
							TCGA-B6-A0I6-01	1	33.0333	4	low
							TCGA-B6-A0IA-01	0	279.7	4	low
							TCGA-B6-A0RN-01	0	266.933	4	low
							TCGA-B6-A0RP-01	1	104.2	4	low
							TCGA-B6-A0RU-01	0	286.833	4	low
							TCGA-B6-A0WS-01	1	98.8333	4	low
							TCGA-B6-A0WY-01	1	115.367	4	low
							TCGA-B6-A0X1-01	1	248.5	4	low
							TCGA-B6-A0X5-01	1	69.9	4	low
							TCGA-B6-A40B-01	0	105.067	4	low
							TCGA-BH-A0AW-01	0	20.7333	4	low
							TCGA-BH-A0AZ-01	0	63.9667	4	low
							TCGA-BH-A0B1-01	0	38.2667	4	low
							TCGA-BH-A0B4-01	0	39.7	4	low
							TCGA-BH-A0B7-01	0	85.3	4	low
							TCGA-BH-A0BC-01	0	32.4667	4	low
							TCGA-BH-A0BD-01	0	18.4667	4	low
							TCGA-BH-A0BJ-01	0	22	4	low
							TCGA-BH-A0C1-01	1	47.0333	4	low
							TCGA-BH-A0C7-01	0	92.2333	4	low
							TCGA-BH-A0DI-01	0	30.4	4	low
							TCGA-BH-A0DS-01	0	2.6	4	low
							TCGA-BH-A0DV-01	0	68.8	4	low
							TCGA-BH-A0EB-01	0	24.8333	4	low
							TCGA-BH-A0GZ-01	0	10.9333	4	low
							TCGA-BH-A0HQ-01	0	37.3667	4	low
							TCGA-BH-A0W4-01	0	25.3	4	low
							TCGA-BH-A18M-01	1	73.5667	4	low
							TCGA-BH-A18U-01	1	52.1	4	low
							TCGA-BH-A1ES-06	1	115.4	4	low
							TCGA-BH-A1ET-01	1	84	4	low
							TCGA-BH-A1EW-01	1	56.4667	4	low
							TCGA-BH-A1EX-01	1	50.2667	4	low
							TCGA-BH-A5J0-01	0	23.8333	4	low
							TCGA-BH-A6R8-01	0	9.76667	4	low
							TCGA-BH-A6R9-01	0	5.33333	4	low
							TCGA-C8-A12O-01	0	12.8333	4	low
							TCGA-C8-A12U-01	0	12.8333	4	low
							TCGA-C8-A131-01	0	13.7	4	low
							TCGA-C8-A1HE-01	0	12.5	4	low
							TCGA-C8-A274-01	0	16.9333	4	low
							TCGA-C8-A27A-01	0	24.9	4	low
							TCGA-D8-A1JA-01	0	16.7333	4	low
							TCGA-D8-A1JC-01	0	16	4	low
							TCGA-D8-A1JL-01	0	20.3667	4	low
							TCGA-D8-A1JM-01	0	19.6667	4	low
							TCGA-D8-A1JP-01	0	21.3	4	low
							TCGA-D8-A1JT-01	0	13.5	4	low
							TCGA-D8-A1XG-01	0	14.9333	4	low
							TCGA-D8-A1XK-01	0	14.7	4	low
							TCGA-D8-A1XL-01	0	20.2	4	low
							TCGA-D8-A1XM-01	0	17.9333	4	low
							TCGA-D8-A1XQ-01	0	16.6333	4	low
							TCGA-D8-A1XS-01	0	16.5333	4	low
							TCGA-D8-A1XZ-01	0	15.5333	4	low
							TCGA-D8-A1Y3-01	0	14.3333	4	low
							TCGA-D8-A27G-01	0	13.6333	4	low
							TCGA-D8-A27P-01	0	1.63333	4	low
							TCGA-D8-A27R-01	0	10.2333	4	low
							TCGA-D8-A27W-01	0	12.4333	4	low
							TCGA-E2-A15A-01	0	23.6667	4	low
							TCGA-E2-A15K-06	0	9.16667	4	low
							TCGA-E2-A15R-01	0	57.7333	4	low
							TCGA-E2-A15T-01	0	52.1	4	low
							TCGA-E2-A1IK-01	0	60	4	low
							TCGA-E2-A1IN-01	0	22.5	4	low
							TCGA-E2-A2P6-01	0	35.0333	4	low
							TCGA-E2-A570-01	0	31.0333	4	low
							TCGA-E2-A572-01	0	40.2667	4	low
							TCGA-E2-A574-01	0	39.3	4	low
							TCGA-E9-A1RB-01	1	32.5333	4	low
							TCGA-E9-A1RE-01	0	47.3	4	low
							TCGA-E9-A1RH-01	0	47.2333	4	low
							TCGA-E9-A22H-01	0	41.0667	4	low
							TCGA-E9-A295-01	0	12.5	4	low
							TCGA-E9-A5FL-01	0	0.8	4	low
							TCGA-E9-A5UP-01	0	26.7667	4	low
							TCGA-EW-A1P0-01	0	41.7	4	low
							TCGA-EW-A1P1-01	0	40.3333	4	low
							TCGA-EW-A1P4-01	0	30.2333	4	low
							TCGA-EW-A1PF-01	0	14.6333	4	low
							TCGA-EW-A2FV-01	0	26.2667	4	low
							TCGA-GI-A2C9-01	0	111.4	4	low
							TCGA-GM-A2DC-01	0	84.5	4	low
							TCGA-GM-A2DK-01	0	88.1667	4	low
							TCGA-JL-A3YW-01	0	12	4	low
							TCGA-JL-A3YX-01	0	11.7333	4	low
							TCGA-LL-A6FR-01	0	16.3	4	low
							TCGA-LQ-A4E4-01	0	28.3	4	low
							TCGA-OL-A5D6-01	1	36.8	4	low
							TCGA-OL-A5D8-01	0	32.4333	4	low
							TCGA-OL-A5RW-01	0	36.8667	4	low
							TCGA-OL-A66J-01	0	66.5333	4	low
							TCGA-OL-A66K-01	1	42.5	4	low
							TCGA-OL-A6VR-01	0	40.6667	4	low
							TCGA-S3-A6ZH-01	0	21.3667	4	low
							TCGA-S3-AA11-01	0	14.0333	4	low
							TCGA-5T-A9QA-01	0	10.1	5	low
							TCGA-A1-A0SH-01	0	47.9	5	low
							TCGA-A1-A0SJ-01	0	13.8667	5	low
							TCGA-A1-A0SM-01	0	8.06667	5	low
							TCGA-A1-A0SN-01	0	39.8667	5	low
							TCGA-A1-A0SQ-01	0	18.4667	5	low
							TCGA-A2-A04U-01	0	88.4667	5	low
							TCGA-A2-A04W-01	0	103.4	5	low
							TCGA-A2-A0CX-01	0	57.6	5	low
							TCGA-A2-A0EM-01	0	103.133	5	low
							TCGA-A2-A0ER-01	0	75.4333	5	low
							TCGA-A2-A0YC-01	0	33	5	low
							TCGA-A2-A1FZ-01	0	22.7667	5	low
							TCGA-A2-A25E-01	0	106.8	5	low
							TCGA-A2-A3XU-01	1	30.4	5	low
							TCGA-A7-A0CD-01	0	38.8333	5	low
							TCGA-A7-A0CE-01	0	35.8	5	low
							TCGA-A7-A0CJ-01	0	31.0333	5	low
							TCGA-A7-A0D9-01	0	37.9667	5	low
							TCGA-A8-A06P-01	0	13.2	5	low
							TCGA-A8-A06R-01	0	18.2333	5	low
							TCGA-A8-A06Y-01	0	26.3667	5	low
							TCGA-A8-A07E-01	0	20.2667	5	low
							TCGA-A8-A07I-01	0	14.2	5	low
							TCGA-A8-A07J-01	0	12.1667	5	low
							TCGA-A8-A082-01	0	18.3	5	low
							TCGA-A8-A08O-01	0	31.4333	5	low
							TCGA-A8-A08P-01	0	31.4333	5	low
							TCGA-A8-A08Z-01	0	40.5667	5	low
							TCGA-A8-A092-01	0	31.4	5	low
							TCGA-A8-A095-01	0	42.5667	5	low
							TCGA-A8-A09R-01	0	9.1	5	low
							TCGA-A8-A09X-01	1	14.2	5	low
							TCGA-A8-A0A9-01	0	27.4	5	low
							TCGA-AC-A23E-01	0	23.2667	5	low
							TCGA-AC-A62V-01	1	11.6	5	low
							TCGA-AC-A62X-01	0	13.9	5	low
							TCGA-AC-A62Y-01	0	17.6667	5	low
							TCGA-AC-A7VC-01	0	0.0333333	5	low
							TCGA-AN-A03X-01	0	0.333333	5	low
							TCGA-AN-A041-01	0	0.233333	5	low
							TCGA-AN-A049-01	0	0.633333	5	low
							TCGA-AN-A04D-01	0	1.73333	5	low
							TCGA-AN-A0AL-01	0	7.56667	5	low
							TCGA-AN-A0AS-01	0	0.333333	5	low
							TCGA-AN-A0XL-01	0	5.43333	5	low
							TCGA-AN-A0XR-01	0	0.333333	5	low
							TCGA-AO-A03L-01	0	81.4	5	low
							TCGA-AO-A0J2-01	0	33.2333	5	low
							TCGA-AO-A0J5-01	1	26.4	5	low
							TCGA-AO-A12F-01	0	61.4	5	low
							TCGA-AQ-A04L-01	0	131.9	5	low
							TCGA-AQ-A1H2-01	0	15.8333	5	low
							TCGA-AR-A0TY-01	1	56.6333	5	low
							TCGA-AR-A0TZ-01	1	108.733	5	low
							TCGA-AR-A0U3-01	0	136	5	low
							TCGA-AR-A1AN-01	0	97.3333	5	low
							TCGA-AR-A24M-01	0	122	5	low
							TCGA-AR-A256-01	1	95.1333	5	low
							TCGA-AR-A2LK-01	1	54.9667	5	low
							TCGA-B6-A0I1-01	1	78.7	5	low
							TCGA-B6-A0I9-01	1	12.0667	5	low
							TCGA-B6-A0IC-01	1	51.4	5	low
							TCGA-B6-A0IG-01	1	148.533	5	low
							TCGA-B6-A0IK-01	1	19.0333	5	low
							TCGA-B6-A0RH-01	1	215.2	5	low
							TCGA-B6-A0RI-01	0	237.533	5	low
							TCGA-B6-A0RS-01	1	102.1	5	low
							TCGA-B6-A0WZ-01	0	209.733	5	low
							TCGA-B6-A1KF-01	0	102.933	5	low
							TCGA-B6-A1KI-01	0	74.5333	5	low
							TCGA-B6-A1KN-01	0	141.1	5	low
							TCGA-BH-A0BP-01	1	76.5333	5	low
							TCGA-BH-A0BR-01	0	77.6667	5	low
							TCGA-BH-A0BV-01	0	50.6333	5	low
							TCGA-BH-A0BZ-01	0	75.1667	5	low
							TCGA-BH-A0DH-01	0	38.5333	5	low
							TCGA-BH-A0DQ-01	0	3.26667	5	low
							TCGA-BH-A0DZ-01	0	16.5	5	low
							TCGA-BH-A0HF-01	0	24.2333	5	low
							TCGA-BH-A0HU-01	0	13.0667	5	low
							TCGA-BH-A0W3-01	0	24.2667	5	low
							TCGA-BH-A0WA-01	0	23.3667	5	low
							TCGA-BH-A18G-01	0	4.96667	5	low
							TCGA-BH-A18P-01	1	30.7	5	high
							TCGA-BH-A18S-01	1	66.9667	5	high
							TCGA-BH-A18T-01	1	7.46667	5	high
							TCGA-BH-A18V-01	1	51.8667	5	high
							TCGA-BH-A1F2-01	1	31.9667	5	high
							TCGA-BH-A1FJ-01	1	64.2333	5	high
							TCGA-BH-A1FM-01	1	46.2667	5	high
							TCGA-BH-A1FR-01	1	54.7333	5	high
							TCGA-BH-A201-01	0	28.5333	5	high
							TCGA-BH-A208-01	1	58.6333	5	high
							TCGA-BH-A42T-01	1	10.6667	5	high
							TCGA-BH-A8FY-01	1	9.83333	5	high
							TCGA-C8-A12L-01	0	12.1	5	high
							TCGA-C8-A12N-01	0	11.9333	5	high
							TCGA-C8-A12W-01	0	12.8333	5	high
							TCGA-C8-A134-01	0	12.7667	5	high
							TCGA-C8-A1HI-01	0	11.4333	5	high
							TCGA-C8-A1HO-01	0	12.5	5	high
							TCGA-C8-A26Y-01	0	13.1333	5	high
							TCGA-C8-A26Z-01	0	15.6667	5	high
							TCGA-C8-A8HQ-01	0	12.6667	5	high
							TCGA-D8-A13Z-01	0	21.1667	5	high
							TCGA-D8-A142-01	0	14.1667	5	high
							TCGA-D8-A143-01	0	14.3667	5	high
							TCGA-D8-A1JD-01	0	18.4	5	high
							TCGA-D8-A1JE-01	0	19.1667	5	high
							TCGA-D8-A1JK-01	0	20.4	5	high
							TCGA-D8-A1JS-01	0	12.3667	5	high
							TCGA-D8-A1X5-01	0	18.8333	5	high
							TCGA-D8-A1X6-01	0	18.0333	5	high
							TCGA-D8-A1X9-01	0	24.2333	5	high
							TCGA-D8-A1XC-01	1	12.5667	5	high
							TCGA-D8-A1XJ-01	0	22.1333	5	high
							TCGA-D8-A1XR-01	0	16.0667	5	high
							TCGA-D8-A1XU-01	0	13.1667	5	high
							TCGA-D8-A1XW-01	0	43.6333	5	high
							TCGA-D8-A27E-01	0	17.6667	5	high
							TCGA-D8-A27F-01	0	16.2667	5	high
							TCGA-D8-A3Z6-01	0	18.7667	5	high
							TCGA-E2-A105-01	0	43.6	5	high
							TCGA-E2-A10B-01	0	38.0333	5	high
							TCGA-E2-A14O-01	0	45.3	5	high
							TCGA-E2-A14T-01	0	77.0333	5	high
							TCGA-E2-A14V-01	0	34.7333	5	high
							TCGA-E2-A14W-01	0	32.4667	5	high
							TCGA-E2-A150-01	0	64.5	5	high
							TCGA-E2-A153-01	0	23.5667	5	high
							TCGA-E2-A156-01	0	24.2	5	high
							TCGA-E2-A15H-01	0	13.1	5	high
							TCGA-E2-A1B0-01	0	54.3667	5	high
							TCGA-E2-A1BC-01	0	16.7	5	high
							TCGA-E2-A1IF-01	0	37.9333	5	high
							TCGA-E2-A1IL-01	0	3.93333	5	high
							TCGA-E2-A1LE-01	1	29.3	5	high
							TCGA-E2-A1LK-01	1	8.86667	5	high
							TCGA-E2-A2P5-01	1	27.3667	5	high
							TCGA-E2-A56Z-01	0	8.4	5	high
							TCGA-E2-A9RU-01	0	17.9333	5	high
							TCGA-E9-A1NA-01	0	37.0667	5	high
							TCGA-E9-A1NF-01	1	35.7333	5	high
							TCGA-E9-A1NI-01	0	10	5	high
							TCGA-E9-A1R3-01	0	2.6	5	high
							TCGA-E9-A1R5-01	0	3.06667	5	high
							TCGA-E9-A1R7-01	0	48.9	5	high
							TCGA-E9-A1RD-01	0	1.13333	5	high
							TCGA-E9-A22A-01	0	39.6333	5	high
							TCGA-E9-A22E-01	0	42.3	5	high
							TCGA-E9-A247-01	0	39.5333	5	high
							TCGA-E9-A54X-01	0	24.2333	5	high
							TCGA-E9-A6HE-01	0	28.2333	5	high
							TCGA-EW-A1P8-01	1	7.96667	5	high
							TCGA-EW-A6S9-01	0	15.4333	5	high
							TCGA-GM-A2DM-01	0	107.533	5	high
							TCGA-GM-A5PX-01	0	18.3667	5	high
							TCGA-LL-A5YM-01	0	15.5333	5	high
							TCGA-LL-A5YP-01	0	15	5	high
							TCGA-LL-A6FQ-01	0	2.66667	5	high
							TCGA-OL-A5RZ-01	0	22.6333	5	high
							TCGA-OL-A6VO-01	0	28.6	5	high
							TCGA-PL-A8LZ-01	0	10.0667	5	high
							TCGA-Z7-A8R6-01	0	108.533	5	high
							TCGA-A1-A0SD-01	0	14.5667	6	high
							TCGA-A2-A04R-01	0	123.633	6	high
							TCGA-A2-A0CS-01	1	78.2667	6	high
							TCGA-A2-A0CT-01	0	76.3	6	high
							TCGA-A2-A0D4-01	0	25.5667	6	high
							TCGA-A2-A0EU-01	0	34.7667	6	high
							TCGA-A2-A0SV-01	1	27.5	6	high
							TCGA-A2-A0T0-01	0	17.7667	6	high
							TCGA-A2-A0T2-01	1	8.5	6	high
							TCGA-A2-A0T7-01	0	21.0333	6	high
							TCGA-A2-A0YE-01	0	18.4667	6	high
							TCGA-A2-A0YF-01	0	51.1667	6	high
							TCGA-A2-A0YG-01	0	22.2	6	high
							TCGA-A2-A0YT-01	1	24.1	6	high
							TCGA-A2-A4S0-01	0	23.5333	6	high
							TCGA-A2-A4S1-01	0	27.3333	6	high
							TCGA-A7-A13F-01	0	25.5	6	high
							TCGA-A7-A3RF-01	0	13.6	6	high
							TCGA-A7-A4SE-01	0	21.4667	6	high
							TCGA-A7-A5ZV-01	0	12.2667	6	high
							TCGA-A7-A6VW-01	0	9.5	6	high
							TCGA-A7-A6VX-01	0	10.5667	6	high
							TCGA-A8-A06X-01	1	31.4333	6	high
							TCGA-A8-A06Z-01	0	1.03333	6	high
							TCGA-A8-A076-01	0	54.7333	6	high
							TCGA-A8-A07L-01	0	32.5	6	high
							TCGA-A8-A07O-01	0	10.1333	6	high
							TCGA-A8-A07P-01	0	11.1333	6	high
							TCGA-A8-A07S-01	0	8.1	6	high
							TCGA-A8-A07W-01	0	10.1333	6	high
							TCGA-A8-A07Z-01	0	45.7	6	high
							TCGA-A8-A085-01	0	37.4667	6	high
							TCGA-A8-A08A-01	0	1	6	high
							TCGA-A8-A08J-01	1	37.5667	6	high
							TCGA-A8-A093-01	0	18.2	6	high
							TCGA-A8-A099-01	0	10.1333	6	high
							TCGA-A8-A09E-01	0	49.7333	6	high
							TCGA-A8-A09T-01	0	19.3	6	high
							TCGA-A8-A09W-01	0	1	6	high
							TCGA-AC-A23H-01	1	5.8	6	high
							TCGA-AC-A3EH-01	1	6.56667	6	high
							TCGA-AC-A3YJ-01	0	25.1333	6	high
							TCGA-AC-A5EH-01	0	17.0333	6	high
							TCGA-AC-A7VB-01	0	8.33333	6	high
							TCGA-AC-A8OR-01	0	1.33333	6	high
							TCGA-AN-A04A-01	0	3	6	high
							TCGA-AN-A04C-01	0	1.8	6	high
							TCGA-AN-A0AK-01	0	7.46667	6	high
							TCGA-AN-A0FK-01	0	7.1	6	high
							TCGA-AN-A0FL-01	0	7.7	6	high
							TCGA-AN-A0FV-01	0	0.333333	6	high
							TCGA-AN-A0FZ-01	0	0.333333	6	high
							TCGA-AN-A0G0-01	0	0.533333	6	high
							TCGA-AN-A0XP-01	0	0.3	6	high
							TCGA-AO-A0J3-01	0	21.7	6	high
							TCGA-AO-A0JA-01	0	21.8333	6	high
							TCGA-AO-A0JM-01	0	72.8	6	high
							TCGA-AO-A12B-01	0	99.6333	6	high
							TCGA-AO-A12H-01	0	41.1333	6	high
							TCGA-AO-A1KT-01	0	18.0333	6	high
							TCGA-AQ-A04H-01	0	25.1333	6	high
							TCGA-AQ-A0Y5-01	1	5.73333	6	high
							TCGA-AR-A1AS-01	0	38.3333	6	high
							TCGA-AR-A1AV-01	0	62.1333	6	high
							TCGA-AR-A1AY-01	0	34.2	6	high
							TCGA-AR-A24L-01	1	95.5333	6	high
							TCGA-AR-A24T-01	0	106.733	6	high
							TCGA-B6-A0I8-01	1	24.9667	6	high
							TCGA-B6-A0IB-01	1	131.367	6	high
							TCGA-B6-A0IM-01	1	129.1	6	high
							TCGA-B6-A0RE-01	0	259.233	6	high
							TCGA-B6-A0RG-01	0	69.4	6	high
							TCGA-B6-A0RO-01	0	164.3	6	high
							TCGA-B6-A0WV-01	1	80.5667	6	high
							TCGA-B6-A0WW-01	1	18.6	6	high
							TCGA-B6-A400-01	0	7.16667	6	high
							TCGA-B6-A409-01	1	19.1	6	high
							TCGA-BH-A0AV-01	0	60.6667	6	high
							TCGA-BH-A0BS-01	0	87.0667	6	high
							TCGA-BH-A0E1-01	0	15.9	6	high
							TCGA-BH-A0E7-01	0	45.4333	6	high
							TCGA-BH-A0H6-01	0	24.9	6	high
							TCGA-BH-A0H7-01	0	23.4	6	high
							TCGA-BH-A0H9-01	0	41.5667	6	high
							TCGA-BH-A0HI-01	0	20.6667	6	high
							TCGA-BH-A0HO-01	0	2.53333	6	high
							TCGA-BH-A0HX-01	0	27.6333	6	high
							TCGA-BH-A0HY-01	0	51.5	6	high
							TCGA-BH-A18J-01	1	20.4	6	high
							TCGA-BH-A18K-01	1	92.1	6	high
							TCGA-BH-A18L-01	1	27.0333	6	high
							TCGA-BH-A18N-01	1	38.2667	6	high
							TCGA-BH-A1EN-01	1	70.9	6	high
							TCGA-BH-A1F8-01	1	25.4333	6	high
							TCGA-BH-A1FD-01	1	33.6333	6	high
							TCGA-BH-A1FE-06	1	75.7667	6	high
							TCGA-BH-A1FN-01	1	73.0667	6	high
							TCGA-BH-A204-01	1	84.4667	6	high
							TCGA-BH-A5IZ-01	0	18.9	6	high
							TCGA-C8-A12P-01	0	11.9333	6	high
							TCGA-C8-A12Q-01	1	12.8333	6	high
							TCGA-C8-A12Y-01	0	49.2	6	high
							TCGA-C8-A12Z-01	0	12.7333	6	high
							TCGA-C8-A137-01	0	12.6333	6	high
							TCGA-C8-A1HL-01	0	10.5667	6	high
							TCGA-C8-A1HN-01	0	13.1333	6	high
							TCGA-C8-A26V-01	0	20.5333	6	high
							TCGA-C8-A273-01	0	17.1	6	high
							TCGA-C8-A3M8-01	0	13.1333	6	high
							TCGA-D8-A1J9-01	0	17.7333	6	high
							TCGA-D8-A1JI-01	0	19.2333	6	high
							TCGA-D8-A1JJ-01	0	20.3667	6	high
							TCGA-D8-A1X7-01	0	16.9667	6	high
							TCGA-D8-A1XT-01	0	16.8667	6	high
							TCGA-D8-A1XY-01	0	16.7667	6	high
							TCGA-D8-A1Y1-01	1	10.0667	6	high
							TCGA-D8-A27H-01	0	13.2333	6	high
							TCGA-D8-A27N-01	0	17.3	6	high
							TCGA-D8-A73W-01	1	12.8333	6	high
							TCGA-E2-A106-01	0	84.7	6	high
							TCGA-E2-A107-01	0	34.9	6	high
							TCGA-E2-A109-01	0	47.2333	6	high
							TCGA-E2-A10A-01	0	40.9667	6	high
							TCGA-E2-A14Y-01	0	70.3	6	high
							TCGA-E2-A152-01	0	70.9333	6	high
							TCGA-E2-A15L-01	0	20.8667	6	high
							TCGA-E2-A1IE-01	0	78.7333	6	high
							TCGA-E2-A1IG-01	0	71.3333	6	high
							TCGA-E2-A1L9-01	0	19.9333	6	high
							TCGA-E2-A1LB-01	0	76.8667	6	high
							TCGA-E2-A1LL-01	0	43.6333	6	high
							TCGA-E9-A1N6-01	1	22.6	6	high
							TCGA-E9-A1NG-01	1	26.2	6	high
							TCGA-E9-A1NH-01	0	19.2	6	high
							TCGA-E9-A1R6-01	0	11.3	6	high
							TCGA-E9-A1RG-01	0	21.5667	6	high
							TCGA-E9-A226-01	1	34.9333	6	high
							TCGA-E9-A228-01	0	42.8333	6	high
							TCGA-E9-A22B-01	0	38.9	6	high
							TCGA-E9-A244-01	0	0.7	6	high
							TCGA-E9-A24A-01	0	24.9	6	high
							TCGA-E9-A5UO-01	0	26.1667	6	high
							TCGA-EW-A1OW-01	0	23.1333	6	high
							TCGA-EW-A1OX-01	0	30.3667	6	high
							TCGA-EW-A1OY-01	0	30.2667	6	high
							TCGA-EW-A1P5-01	0	23.4333	6	high
							TCGA-EW-A1PC-01	0	6.23333	6	high
							TCGA-EW-A1PD-01	0	14.1333	6	high
							TCGA-EW-A2FR-01	0	55.7667	6	high
							TCGA-EW-A2FW-01	0	22.4	6	high
							TCGA-EW-A6SA-01	0	17	6	high
							TCGA-GM-A2DL-01	0	117.3	6	high
							TCGA-LL-A442-01	0	29.6333	6	high
							TCGA-LL-A6FP-01	0	22.5667	6	high
							TCGA-LL-A740-01	0	14.7	6	high
							TCGA-PL-A8LX-01	0	0.166667	6	high
							TCGA-UU-A93S-01	1	3.86667	6	high
[truncated: 23 more columns]
