# Supplementary material for: Novel Immune Infiltrating Cell Signature Based on Cell Pair Algorithm Is a Prognostic Marker in Cancer
Source: Front Immunol. 2021 Sep 14;12:694490. doi: 10.3389/fimmu.2021.694490 (PMC8476752; doi:10.3389/fimmu.2021.694490)
Supplement: Supplementary file 7 [file DataSheet_7.xlsx]

## Sheet: Sheet1
Table S7. Indicators for the assessment of immunogenicity and antigen presentation capacity.
Indicator	Details	Reference(s) [PMID]
Nonsilent Mutation Rate	Non-silent mutations include missense mutations which change an amino acid to another amino acid, nonsense mutations which change an amino acid to a stop codon, mutations in splice sites and insertions or deletions (indels).	https://pubmed.ncbi.nlm.nih.gov/29628290
MSI score	Microsatellite instability (MSI) is a pattern of hypermutation that occurs at genomic microsatellites and is caused by defects in the mismatch repair system.	https://pubmed.ncbi.nlm.nih.gov/29850653
SNV Neoantigens	Single nucleotide variation (SNV) neoantigens were identified through NetMHCpan v3.0,based on HLA types obtained from RNA-seq using OptiType (version 1.2)	https://pubmed.ncbi.nlm.nih.gov/27029192
Indel Neoantigens	Insertion-deletion (indel) neoantigens were identified through NetMHCpan v3.0,based on HLA types obtained from RNA-seq using OptiType (version 1.2)	https://pubmed.ncbi.nlm.nih.gov/27029192
CTA score	Cancer/testis-antigen (CTA)	https://pubmed.ncbi.nlm.nih.gov/29628290
Aneuploidy score	Aneuploidy scores (AS) were the sum of amplified or deleted (collectively "altered") chromosome arms	https://pubmed.ncbi.nlm.nih.gov/29622463
Intratumor Heterogeneity	Intratumor genetic heterogeneity is a feature of tumors that refers to the repertoire of co-existing genetically distinct subclonal populations.	https://pubmed.ncbi.nlm.nih.gov/26840267
Number of Segs	Number of copy number variant segments	https://pubmed.ncbi.nlm.nih.gov/29628290
Fraction Altered	Fraction of genome alterations	https://pubmed.ncbi.nlm.nih.gov/29628290
HRD	Homologous recombination defects (HRD) score was determined by three separate DNA-based measures of genomic instability: large (> 15 Mb) non-arm-level regions with loss of heterozygosity (LOH), telomeric allelic imbalance (TAI), and large-scale state transitions (LST) with breaks between adjacent segments of > 10 Mb	https://pubmed.ncbi.nlm.nih.gov/29628290
TCR Shannon	TCR diversity (Shannon Entropy) scores were identified using MiTCR v1.0.3, with previously described parameters	https://pubmed.ncbi.nlm.nih.gov/23892897
TCR Richness	TCR diversity (Richness) scores were identified using MiTCR v1.0.3, with previously described parameters	https://pubmed.ncbi.nlm.nih.gov/23892897
Cytolytic Activity	Cytolytic activity (CYT) was assessed by the geometric mean of granzyme A (GZMA) and perforin (PRF1) expression levels	https://pubmed.ncbi.nlm.nih.gov/25594174
APM score	Antigen processing and presenting machinery (APM) scores were generated by GSVA on the basis of 18 genes relevant to APM	https://pubmed.ncbi.nlm.nih.gov/31767055
CD8, IFNG, ISG.RS and IFNG.GS	Stroma signatures as a determinant of immune exclusion	https://pubmed.ncbi.nlm.nih.gov/31398344/
GEP	The T cell-inflamed GEP contained IFN-γ-responsive genes related to antigen presentation, chemokine expression, cytotoxic activity, and adaptive immune resistance	https://pubmed.ncbi.nlm.nih.gov/28650338/
TGF-beta Response	Stroma signatures as a determinant of immune exclusion	https://pubmed.ncbi.nlm.nih.gov/29628290
TMB	Tumor mutational burden (TMB) is an emerging biomarker of sensitivity to immune checkpoint inhibitors	https://pubmed.ncbi.nlm.nih.gov/29262275/
Leukocyte fraction	Stroma signatures as a determinant of immune exclusion	https://pubmed.ncbi.nlm.nih.gov/29628290
